# Supplementary material for: The carbon and nitrogen budget of Desmophyllum dianthus—a voracious cold-water coral thriving in an acidified Patagonian fjord
Source: PeerJ. 2021 Dec 9;9:e12609. doi: 10.7717/peerj.12609 (PMC8667745; doi:10.7717/peerj.12609)
Supplement: Supplemental Information 1 [file peerj-09-12609-s001.xlsx]

## Sheet: Metadata
RAW DATA FOR PUBLICATION
The carbon and nitrogen budget of Desmophyllum dianthus - a voracious cold-water coral thriving in an acidified Patagonian fjord
Sandra R. Maier1,2, Carin Jantzen1, Jürgen Laudien1, Verena Häussermann3,4, Günter Försterra5, Astrid Cornils1, Jutta Niggemann6, Thorsten Dittmar6,7, Claudio Richter1,8
1 Department of Biosciences, Alfred Wegener Institute Helmholtz Center for Polar and Marine Research, Bremerhaven, Germany
2 Department of Estuarine and Delta Systems, Royal Netherlands Institute for Sea Research (NIOZ-Yerseke), Yerseke, Netherlands
3 Facultad de Economía y Negocios, Universidad San Sebastián, Puerto Montt, Chile
4 Huinay Foundation, Puerto Montt, Chile
5 Escuela de Ciencias del Mar, Facultad de Recursos Naturales, Pontificia Universidad Católica de Valparaíso, Valparaíso, Chile
6 Institute for Chemistry and Biology of the Marine Environment (ICBM), University of Oldenburg, Oldenburg, Germany
7 Helmholtz Institute for Functional Marine Biodiversity (HIFMB), University of Oldenburg, Oldenburg, Germany
8 Department of Biology/Chemistry, University of Bremen, Bremen, Germany
* Corresponding author. E-mail address: mail.maier.sandra@gmail.com
METADATA
Supp_File_1.1	Experimental design (feeding treatments, incubations) in chronological order
Supp_File_1.2	All parameters (C, N fluxes & rates) of carbon and nitrogen budget
Supp_File_1.3	Raw data for calculation of C and N uptake (S1)
Supp_File_1.4	Raw data for calculation of zooplankton capture (S1)
Supp_File_1.5	Raw data for calculation of respiration, oxygen fluxes (S1)
Supp_File_1.6	Raw data for calculation of ammonium excretion, ammonium fluxes (S1)
Supp_File_1.7	Raw data for calculation of POC and PON release, POC and PON fluxes (S1)
Supp_File_1.8	Raw data for calculation of DOC and DON release, DOC and DON fluxes (S1)
Supp_File_1.9	Zooplankton density next to coral banks in Comau Fjord
Supp_File_1.10	Statistical results of linear mixed effect models (LME) comparing parameters between treatments
FEEDING TREATMENTS
zooplankton	fed with fjord zooplankton; incubated 2-3h after feeding for 9-11 h (corals batches I & II)
zooplankton+krill	fed with zooplankton and subsequently with krill (coral batch I)
>> zooplankton+krill_day1 (krill.d1)	>> zooplankton+krill-fed corals, incubated 0.5-1 h after feeding for 9-11 h
>> zooplankton+krill_day2 (krill.d2)	>> zooplankton+krill-fed corals, incubated a second time 24 h after feeding for 9-11 h
unfed	4-day food-deprived, incubated afterwards for 9-11 h (coral batch II)
ABBREVIATIONS (in alphabetical order)
C	carbon
d	day
DM	dry mass
DOC	dissolved organic carbon
DON	dissolved organic nitrogen
N	nitrogen
NH4+	ammonium
O2	oxygen
POC	particulate organic carbon
PON	particulate organic nitrogen
zoopl	zooplankton/zooplankters
SD	standard deviation
SE	standard error
df	degrees of freedom
LME	linear mixed effect model

## Sheet: 1.1_ExpDesignChrono
Date	CORAL BATCH I						CORAL BATCH II
	SUBSET A (n=3, coral IDs: X1, X2, L9)			SUBSET B (n=3, coral IDs: X5, L1, L5)			SUBSET A (n=3, coral IDs: X8, X10, L8)			SUBSET B (n=3, coral IDs: L3, L4, L7)			SUBSET C (n=1, coral ID: L2)
	Feeding in maintenance tank	Feeding treatment	Incubation	Feeding in maintenance tank	Feeding treatment	Incubation	Feeding in maintenance tank	Feeding treatment	Incubation	Feeding in maintenance tank	Feeding treatment	Incubation	Feeding in maintenance tank	Feeding treatment	Incubation
21/012012-24/01/2012	CORAL COLLECTION			CORAL COLLECTION			CORAL COLLECTION			CORAL COLLECTION			CORAL COLLECTION
25/01/2012-10/02/2012	ACCLIMATI-ZATION: zooplankton (1x per day)			ACCLIMATI-ZATION: zooplankton (1x per day)			ACCLIMATI-ZATION: zooplankton (1x per day)			ACCLIMATI-ZATION: zooplankton (1x per day)			ACCLIMATI-ZATION: zooplankton (1x per day)
2012-02-11	zooplankton			zooplankton				zooplankton	zoopl start	zooplankton			zooplankton
2012-02-12		zooplankton	zoopl start	zooplankton			zooplankton		zoopl end	zooplankton			zooplankton
2012-02-13	zooplankton		zoopl end	zooplankton			zooplankton			zooplankton			zooplankton
2012-02-14	zooplankton			zooplankton			zooplankton				zooplankton	zoopl start	zooplankton
2012-02-15	zooplankton			zooplankton			zooplankton			zooplankton		zoopl end	zooplankton
2012-02-16	zooplankton			zooplankton			zooplankton			zooplankton			zooplankton
2012-02-17	zooplankton				zooplankton	zoopl start		unfed		zooplankton			zooplankton
2012-02-18	zooplankton			zooplankton		zoopl end				zooplankton				zooplankton	zoopl start
2012-02-19	zooplankton			zooplankton						zooplankton			zooplankton		zoopl end
2012-02-20	zooplankton			zooplankton						zooplankton			zooplankton
2012-02-21	zooplankton			zooplankton					unfed start		unfed			unfed
2012-02-22	zooplankton			zooplankton			zooplankton		unfed end
2012-02-23		zooplankton+krill	krill.d1 start		zooplankton+krill	krill.d1 start	zooplankton
2012-02-24		(no more food)	krill.d1 end, krill.d2 start		(no more food)	krill.d1 end, krill.d2 start	zooplankton
2012-02-25	zooplankton		krill.d2 end	zooplankton		krill.d2 end	zooplankton					unfed start			unfed start
2012-02-26	zooplankton			zooplankton			zooplankton			zooplankton		unfed end	zooplankton		unfed end

## Sheet: 1.2_BudgetParameters
Date of measurement	ID	Batch	treatment + incubation	Coral measures					FEEDING														INCUBATION
				polyp dry mass	tissue dry mass	skeletal dry mass	organic carbon content	organic nitrogen content	POC flux	krill C content	total C uptake				PON flux	krill N content	total N uptake				zooplankton flux	zooplankton capture	Oxygen flux	Respiration				Ammonium flux	Ammonium excretion				POC flux	POC release				PON flux	PON release				DOC flux	DOC release				DON flux	DON release
				[g polyp-1]	[g polyp-1]	[g polyp-1]	[mmol C polyp-1]	[mmol N polyp-1]	[μmol C L-1 h-1]	[μmol C krill-1]	[μmol C (polyp)-1 d-1]	[μmol C (mmol tissue-C)-1 d-1]	[μmol C (g polyp DM)-1 d-1]	[μmol C (g skeletal DM)-1 d-1]	[μmol N L-1 h-1]	[μmol N krill-1]	[μmol N (polyp)-1 d-1]	[μmol N (mmol tissue-C)-1 d-1]	[μmol N (g polyp DM)-1 d-1]	[μmol N (g skeletal DM)-1 d-1]	[zooplankters bottle-1 h-1]	[captured zoopl polyp-1 (2 h)-1]	[µmol O2 L-1 h-1]	[μmol O2 (polyp)-1 d-1]	[μmol O2 (mmol tissue-C)-1 d-1]	[μmol O2 (g polyp DM)-1 d-1]	[μmol O2 (g skeletal DM)-1 d-1]	[μmol N L-1 h-1]	[μmol N (polyp)-1 d-1]	[μmol N (mmol tissue-C)-1 d-1]	[μmol N (g polyp DM)-1 d-1]	[μmol N (g skeletal DM)-1 d-1]	[μmol C L-1 h-1]	[μmol C (polyp)-1 d-1]	[μmol C (mmol tissue-C)-1 d-1]	[μmol C (g polyp DM)-1 d-1]	[μmol C (g skeletal DM)-1 d-1]	[μmol N L-1 h-1]	[μmol N (polyp)-1 d-1]	[μmol N (mmol tissue-C)-1 d-1]	[μmol N (g polyp DM)-1 d-1]	[μmol N (g skeletal DM)-1 d-1]	[μmol C L-1 h-1]	[μmol C (polyp)-1 d-1]	[μmol C (mmol tissue-C)-1 d-1]	[μmol C (g polyp DM)-1 d-1]	[μmol C (g skeletal DM)-1 d-1]	[μmol N L-1 h-1]	[μmol N (polyp)-1 d-1]
11.02.2012-12.02.2012	X8	II	zooplankton	7.72141	0.4581	7.26331	4.85867	0.601844	35.5907	NA	44.6206	9.18371	5.77881	6.14328	7.79852	NA	9.96352	2.05067	1.29038	1.37176	221.157	383.349	6.91791	123.651	25.4496	16.0141	17.0241	0.576214	9.58778	1.97333	1.24171	1.32003	-2.63865	32.2239	6.63224	4.17331	4.43652	-0.480011	8.8828	1.82824	1.15041	1.22297	0.0459601	-56.1348	-11.5535	-7.27002	-7.72854	-0.125264	-4.25594
11.02.2012-12.02.2012	X10	II	zooplankton	5.75524	0.202467	5.55277	1.79179	0.265383	30.4739	NA	36.4181	20.325	6.32782	6.55854	6.67344	NA	8.16035	4.5543	1.4179	1.4696	192.032	321.931	3.93506	66.8666	37.3183	11.6184	12.042	0.335771	6.16816	3.44245	1.07175	1.11082	-1.57845	11.9156	6.65012	2.0704	2.14589	-0.249642	4.49015	2.50596	0.780185	0.808632	-0.137225	-60.3027	-33.655	-10.4779	-10.8599	0.020344	-1.46499
11.02.2012-12.02.2012	L8	II	zooplankton	6.10762	0.720267	5.38735	4.42594	0.693249	23.4443	NA	24.9128	5.62881	4.07897	4.62431	4.43549	NA	4.51042	1.01909	0.738491	0.837225	87.4103	112.688	3.92466	66.4131	15.0054	10.8738	12.3276	0.404153	7.80932	1.76444	1.27862	1.44957	-1.24477	5.39508	1.21897	0.883337	1.00144	-0.197856	3.46826	0.78362	0.567857	0.643778	8.51922	107.915	24.3823	17.6689	20.0311	0.249542	2.98843
11.02.2012-12.02.2012	Control1	control	zooplankton	NA	NA	NA	NA	NA	10.7854	NA	NA	NA	NA	NA	2.13684	NA	NA	NA	NA	NA	31.0665	NA	0.382077	NA	NA	NA	NA	0.0841693	NA	NA	NA	NA	-1.18025	NA	NA	NA	NA	-0.247893	NA	NA	NA	NA	2.06262	NA	NA	NA	NA	0.107318	NA
11.02.2012-12.02.2012	Control2	control	zooplankton	NA	NA	NA	NA	NA	8.34609	NA	NA	NA	NA	NA	2.0425	NA	NA	NA	NA	NA	NA	NA	0.579634	NA	NA	NA	NA	0.106182	NA	NA	NA	NA	-0.625957	NA	NA	NA	NA	0.189207	NA	NA	NA	NA	1.37788	NA	NA	NA	NA	0.0247505	NA
11.02.2012-12.02.2012	Control3	control	zooplankton	NA	NA	NA	NA	NA	4.98668	NA	NA	NA	NA	NA	0.760041	NA	NA	NA	NA	NA	NA	NA	0.545593	NA	NA	NA	NA	0.0459418	NA	NA	NA	NA	-1.09407	NA	NA	NA	NA	0.0012701	NA	NA	NA	NA	5.43482	NA	NA	NA	NA	0.154581	NA
12.02.2012-13.02.2012	X1	I	zooplankton	2.78496	0.30756	2.4774	1.86785	0.279243	46.4237	NA	77.3475	41.41	27.7733	31.2212	8.45456	NA	14.93	7.99317	5.36095	6.02649	251.93	383.548	3.1766	55.4212	29.6711	19.9002	22.3707	0.33602	5.83806	3.12555	2.09628	2.35652	-0.759181	16.7241	8.95369	6.00516	6.75067	-0.246755	4.39439	2.35265	1.5779	1.77379	0.437301	-0.598965	-0.320671	-0.215071	-0.241771	0.0237922	3.19708
12.02.2012-13.02.2012	X2	I	zooplankton	4.41576	0.31885	4.09691	1.88053	0.287379	45.6172	NA	75.9941	40.4111	17.2097	18.5491	8.58349	NA	15.1354	8.04847	3.42757	3.69433	214.916	308.903	3.16065	55.0877	29.2938	12.4752	13.4462	0.559157	11.1934	5.95225	2.53486	2.73215	-0.447372	10.6342	5.65491	2.40824	2.59566	-0.093526	1.40322	0.746184	0.317775	0.342507	0.768842	5.86939	3.12114	1.32919	1.43264	0.148057	5.62011
12.02.2012-13.02.2012	L9	I	zooplankton	5.32048	0.384	4.93648	3.62167	0.463852	34.2713	NA	56.5522	15.615	10.6292	11.456	5.66753	NA	10.2032	2.81726	1.91772	2.06689	198.268	273.054	4.67999	84.1812	23.2438	15.8221	17.0529	0.379368	6.87841	1.89924	1.29282	1.39338	-1.00924	21.4563	5.92441	4.03277	4.34647	-0.242797	4.28749	1.18384	0.805845	0.86853	1.07492	11.7643	3.24831	2.21113	2.38313	0.589602	14.1423
12.02.2012-13.02.2012	Control1	control	zooplankton	NA	NA	NA	NA	NA	-2.97805	NA	NA	NA	NA	NA	-0.459608	NA	NA	NA	NA	NA	61.741	NA	0.240786	NA	NA	NA	NA	-0.0597111	NA	NA	NA	NA	0.053155	NA	NA	NA	NA	-0.0209295	NA	NA	NA	NA	0.224793	NA	NA	NA	NA	0.0158798	NA
12.02.2012-13.02.2012	Control2	control	zooplankton	NA	NA	NA	NA	NA	-1.68181	NA	NA	NA	NA	NA	-1.16724	NA	NA	NA	NA	NA	NA	NA	0.327922	NA	NA	NA	NA	-0.0176471	NA	NA	NA	NA	-0.0967278	NA	NA	NA	NA	-0.0760926	NA	NA	NA	NA	-0.0641381	NA	NA	NA	NA	0.012626	NA
12.02.2012-13.02.2012	Control3	control	zooplankton	NA	NA	NA	NA	NA	2.44034	NA	NA	NA	NA	NA	-0.320769	NA	NA	NA	NA	NA	NA	NA	0.442245	NA	NA	NA	NA	0.35566	NA	NA	NA	NA	0.336709	NA	NA	NA	NA	0.0322211	NA	NA	NA	NA	1.24332	NA	NA	NA	NA	-0.448555	NA
14.02.2012-15.02.2012	L4	II	zooplankton	11.9905	0.33946	11.6511	3.19998	0.456918	38.6203	NA	65.6003	20.5002	5.47101	5.63041	8.03251	NA	13.6247	4.25773	1.13628	1.16939	294.999	480.279	5.01449	88.1766	27.5554	7.35385	7.56811	0.495462	10.832	3.38501	0.903377	0.929697	-3.05566	56.998	17.812	4.75358	4.89208	-0.423574	8.46666	2.64585	0.706112	0.726685	-2.18661	-27.7126	-8.66023	-2.3112	-2.37854	0.411043	8.87689
14.02.2012-15.02.2012	L3	II	zooplankton	4.8246	0.211833	4.61276	1.97222	0.320497	28.4681	NA	49.6264	25.1627	10.2861	10.7585	7.33073	NA	12.5931	6.38524	2.61018	2.73005	328.503	547.288	3.6726	62.7128	31.7981	12.9986	13.5955	0.434236	9.36254	4.74721	1.94059	2.0297	-1.99957	36.8586	18.6889	7.63972	7.99056	-0.223251	4.62778	2.34649	0.959206	1.00326	-1.38847	-12.3695	-6.27185	-2.56383	-2.68157	0.46178	9.93728
14.02.2012-15.02.2012	L7	II	zooplankton	3.02619	0.262583	2.7636	2.0149	0.30893	21.164	NA	37.7805	18.7506	12.4845	13.6707	4.86699	NA	8.59474	4.2656	2.84012	3.10998	289.27	468.822	3.70284	63.3428	31.4372	20.9316	22.9204	0.191469	3.53615	1.755	1.16852	1.27954	-1.83739	33.7174	16.7341	11.1419	12.2005	-0.20783	4.32983	2.14891	1.43079	1.56673	3.64138	85.7735	42.5696	28.3437	31.0368	1.41966	28.6354
14.02.2012-15.02.2012	Control1	control	zooplankton	NA	NA	NA	NA	NA	-5.23266	NA	NA	NA	NA	NA	-1.48472	NA	NA	NA	NA	NA	54.8592	NA	0.411468	NA	NA	NA	NA	0.0681818	NA	NA	NA	NA	-0.123448	NA	NA	NA	NA	0.0109863	NA	NA	NA	NA	0.136419	NA	NA	NA	NA	-0.146847	NA
14.02.2012-15.02.2012	Control2	control	zooplankton	NA	NA	NA	NA	NA	-13.5169	NA	NA	NA	NA	NA	-2.19327	NA	NA	NA	NA	NA	NA	NA	0.496526	NA	NA	NA	NA	-0.00420561	NA	NA	NA	NA	0.00805124	NA	NA	NA	NA	0.0557644	NA	NA	NA	NA	-2.44072	NA	NA	NA	NA	0.0150132	NA
14.02.2012-15.02.2012	Control3	control	zooplankton	NA	NA	NA	NA	NA	12.5417	NA	NA	NA	NA	NA	2.42283	NA	NA	NA	NA	NA	NA	NA	0.462279	NA	NA	NA	NA	0.0684129	NA	NA	NA	NA	-0.213103	NA	NA	NA	NA	-0.0245803	NA	NA	NA	NA	0.041759	NA	NA	NA	NA	-0.0115441	NA
17.02.2012-18.02.2012	X5	I	zooplankton	5.2982	0.2862	5.012	2.20829	0.356731	25.4185	NA	42.7272	19.3486	8.06447	8.52498	5.1509	NA	8.7395	3.95759	1.64952	1.74371	216.294	335.33	3.62418	67.1984	30.4301	12.6833	13.4075	0.313613	7.44353	3.37072	1.40492	1.48514	-1.03963	15.9913	7.2415	3.01826	3.19061	-0.126278	3.05668	1.38418	0.576927	0.609872	8.13328	104.978	47.5383	19.8139	20.9454	0.0331588	2.35437
17.02.2012-18.02.2012	L1	I	zooplankton	8.14127	0.46552	7.67575	3.11103	0.500533	20.0015	NA	33.5787	10.7934	4.12451	4.37465	3.96254	NA	6.73794	2.16582	0.827627	0.877821	153.97	207.912	3.69526	68.5638	22.0389	8.42177	8.93253	0.328339	7.79694	2.50622	0.957706	1.01579	-0.577133	6.98739	2.246	0.858268	0.910321	-0.116865	2.8727	0.923391	0.352857	0.374257	1.32962	-27.4422	-8.82094	-3.37076	-3.57519	-0.0411231	0.908289
17.02.2012-18.02.2012	L5	I	zooplankton	2.88956	0.41565	2.47391	2.28172	0.313005	15.9944	NA	27.3839	12.0014	9.47682	11.069	3.19496	NA	5.55469	2.43444	1.92233	2.24531	150.56	202.767	2.74262	50.1679	21.9869	17.3618	20.2788	0.250874	5.93779	2.60234	2.05491	2.40016	-0.354779	2.66813	1.16935	0.923366	1.0785	-0.15312	3.58831	1.57264	1.24182	1.45046	17.1023	280.27	122.833	96.9938	113.29	0.0569509	2.82469
17.02.2012-18.02.2012	Control1	control	zooplankton	NA	NA	NA	NA	NA	0.191167	NA	NA	NA	NA	NA	-0.189616	NA	NA	NA	NA	NA	50.014	NA	0.28937	NA	NA	NA	NA	0.00462963	NA	NA	NA	NA	-0.342109	NA	NA	NA	NA	0.0173834	NA	NA	NA	NA	2.19275	NA	NA	NA	NA	-0.106652	NA
17.02.2012-18.02.2012	Control2	control	zooplankton	NA	NA	NA	NA	NA	1.46765	NA	NA	NA	NA	NA	0.355125	NA	NA	NA	NA	NA	NA	NA	0.225918	NA	NA	NA	NA	0.000451807	NA	NA	NA	NA	-0.24287	NA	NA	NA	NA	-0.00711455	NA	NA	NA	NA	4.61562	NA	NA	NA	NA	-0.105488	NA
17.02.2012-18.02.2012	Control3	control	zooplankton	NA	NA	NA	NA	NA	-3.77635	NA	NA	NA	NA	NA	-0.743356	NA	NA	NA	NA	NA	NA	NA	0	NA	NA	NA	NA	0.00531758	NA	NA	NA	NA	-0.069174	NA	NA	NA	NA	0.0820199	NA	NA	NA	NA	1.41126	NA	NA	NA	NA	-0.051261	NA
18.02.2012-19.02.2012	L2	II	zooplankton	2.46318	0.335467	2.12771	1.45401	0.208454	8.69352	NA	8.3427	5.7377	3.38697	3.92098	1.63559	NA	2.09452	1.44051	0.850333	0.984401	89.9764	31.8417	2.47108	46.4104	31.9188	18.8417	21.8124	0.353953	7.17269	4.93302	2.91197	3.37108	-0.213924	10.5581	7.26134	4.28637	4.96219	-0.0543194	1.80359	1.24042	0.732223	0.847669	-0.486135	-26.6728	-18.3442	-10.8286	-12.5359	-0.123581	-0.424462
18.02.2012-19.02.2012	Control1	control	zooplankton	NA	NA	NA	NA	NA	4.85574	NA	NA	NA	NA	NA	0.918945	NA	NA	NA	NA	NA	74.1872	NA	0.135681	NA	NA	NA	NA	0.0824891	NA	NA	NA	NA	0.770448	NA	NA	NA	NA	0.141999	NA	NA	NA	NA	2.34258	NA	NA	NA	NA	-0.23783	NA
18.02.2012-19.02.2012	Control2	control	zooplankton	NA	NA	NA	NA	NA	-1.13734	NA	NA	NA	NA	NA	-0.791301	NA	NA	NA	NA	NA	NA	NA	0.132424	NA	NA	NA	NA	0.10339	NA	NA	NA	NA	0.190781	NA	NA	NA	NA	-0.0168338	NA	NA	NA	NA	0.647102	NA	NA	NA	NA	-0.0889832	NA
18.02.2012-19.02.2012	Control3	control	zooplankton	NA	NA	NA	NA	NA	7.13174	NA	NA	NA	NA	NA	0.955378	NA	NA	NA	NA	NA	NA	NA	0.0257571	NA	NA	NA	NA	-0.0206044	NA	NA	NA	NA	0.0166178	NA	NA	NA	NA	-0.0114511	NA	NA	NA	NA	-0.356462	NA	NA	NA	NA	0.0211814	NA
21.02.2012-22.02.2012	X8	II	unfed	7.72141	0.4581	7.26331	4.85867	0.601844	NA	NA	0	0	0	0	NA	NA	0	0	0	0	NA	NA	5.44075	97.7831	20.1255	12.6639	13.4626	0.29171	6.89126	1.41834	0.892487	0.948777	-0.28139	4.34075	0.893403	0.56217	0.597626	-0.101916	1.19996	0.246973	0.155407	0.165208	9.68185	120.919	24.8873	15.6602	16.6479	-0.345563	-2.4397
21.02.2012-22.02.2012	X10	II	unfed	5.75524	0.202467	5.55277	1.79179	0.265383	NA	NA	0	0	0	0	NA	NA	0	0	0	0	NA	NA	2.51694	41.8721	23.3689	7.27548	7.54076	0.241107	5.6768	3.16823	0.986372	1.02234	-0.216331	3.11977	1.74114	0.542074	0.561839	-0.0529289	0.258513	0.144276	0.0449179	0.0465557	3.72884	6.24737	3.48666	1.08551	1.12509	-0.220559	-0.030701
21.02.2012-22.02.2012	L8	II	unfed	6.10762	0.720267	5.38735	4.42594	0.693249	NA	NA	0	0	0	0	NA	NA	0	0	0	0	NA	NA	2.42049	39.8429	9.00214	6.52348	7.39565	-0.225	-5.50977	-1.24488	-0.902115	-1.02272	-0.329631	5.30677	1.19902	0.868878	0.985043	-0.0770505	0.725653	0.163954	0.118811	0.134696	4.60956	23.3155	5.26792	3.81744	4.32782	0.245214	9.00839
21.02.2012-22.02.2012	Control1	control	unfed	NA	NA	NA	NA	NA	NA	NA	NA	0	NA	NA	NA	NA	NA	0	NA	NA	NA	NA	0.298111	NA	NA	NA	NA	-0.23132	NA	NA	NA	NA	-0.590321	NA	NA	NA	NA	-0.122835	NA	NA	NA	NA	2.83632	NA	NA	NA	NA	0.0851137	NA
21.02.2012-22.02.2012	Control2	control	unfed	NA	NA	NA	NA	NA	NA	NA	NA	0	NA	NA	NA	NA	NA	0	NA	NA	NA	NA	0.463707	NA	NA	NA	NA	0.126584	NA	NA	NA	NA	0.252996	NA	NA	NA	NA	0.00746073	NA	NA	NA	NA	7.70961	NA	NA	NA	NA	-0.297039	NA
21.02.2012-22.02.2012	Control3	control	unfed	NA	NA	NA	NA	NA	NA	NA	NA	0	NA	NA	NA	NA	NA	0	NA	NA	NA	NA	0.340415	NA	NA	NA	NA	0.118457	NA	NA	NA	NA	0.168797	NA	NA	NA	NA	-0.00359946	NA	NA	NA	NA	-0.321545	NA	NA	NA	NA	-0.445023	NA
23.02.2012-24.02.2012	X1	I	zooplankton+krill_day1	2.78496	0.30756	2.4774	1.86785	0.279243	21.3106	100.384	128.367	68.7243	46.0927	51.815	5.63193	23.928	32.2582	17.2702	11.583	13.021	NA	NA	4.01811	75.2814	40.3038	27.0314	30.3872	0.357955	13.3514	7.14801	4.79411	5.38928	-0.616048	12.1031	6.47968	4.34586	4.88538	-0.117069	2.54669	1.36343	0.914442	1.02797	3.24606	-3.43998	-1.84168	-1.2352	-1.38854	0.00451892	1.4335
23.02.2012-24.02.2012	X2	I	zooplankton+krill_day1	4.41576	0.31885	4.09691	1.88053	0.287379	30.7055	92.1561	135.401	72.0019	30.6632	33.0497	5.82156	21.9486	30.5836	16.2633	6.92602	7.46505	NA	NA	3.35307	62.2766	33.1166	14.1033	15.2009	0.266667	11.1605	5.93477	2.52742	2.72412	-1.10511	21.6393	11.5071	4.90048	5.28187	-0.220201	4.55768	2.42362	1.03214	1.11247	2.33052	-21.3	-11.3266	-4.82363	-5.19904	0.00899475	1.52024
23.02.2012-24.02.2012	L9	I	zooplankton+krill_day1	5.32048	0.384	4.93648	3.62167	0.463852	36.0315	233.596	285.165	78.7385	53.5975	57.7668	7.0703	55.9764	66.5727	18.3818	12.5125	13.4859	NA	NA	7.12545	134.995	37.2741	25.3726	27.3463	1.17982	33.0761	9.13284	6.21675	6.70034	-1.0845	21.1	5.82603	3.9658	4.27429	-0.235236	4.81965	1.33078	0.905866	0.976332	7.68769	82.6764	22.8283	15.5393	16.748	0.356344	8.24313
23.02.2012-24.02.2012	X5	I	zooplankton+krill_day1	5.2982	0.2862	5.012	2.20829	0.356731	29.3871	100.776	141.783	64.2048	26.7605	28.2886	5.67843	24.0223	32.4052	14.6744	6.11628	6.46553	NA	NA	4.77417	89.7932	40.6619	16.9479	17.9156	0.553769	18.0509	8.17418	3.407	3.60155	-1.26617	24.7244	11.1962	4.66656	4.93303	-0.248194	5.092	2.30586	0.961082	1.01596	0.632744	-54.2967	-24.5877	-10.2481	-10.8333	-0.0293906	0.769587
23.02.2012-24.02.2012	L1	I	zooplankton+krill_day1	8.14127	0.46552	7.67575	3.11103	0.500533	33.0965	148.184	195.195	62.7427	23.976	25.4301	6.64576	35.4278	45.3771	14.5859	5.57371	5.91175	NA	NA	5.07149	95.5549	30.7148	11.7371	12.4489	0.868505	25.6046	8.23027	3.14504	3.33578	-1.08005	21.0961	6.78107	2.59126	2.74841	-0.248373	5.09414	1.63744	0.625719	0.663667	14.1391	208.538	67.0316	25.6149	27.1684	-0.279937	-4.10601
23.02.2012-24.02.2012	L5	I	zooplankton+krill_day1	2.88956	0.41565	2.47391	2.28172	0.313005	29.8007	97.2495	139.034	60.9341	48.116	56.2001	5.3718	23.1739	31.0798	13.6212	10.7559	12.563	NA	NA	3.66609	68.4003	29.9776	23.6715	27.6486	0.395673	14.2567	6.24822	4.93384	5.76279	-1.20109	23.5178	10.3071	8.13886	9.5063	-0.256476	5.26669	2.30821	1.82266	2.12889	1.06056	-46.0874	-20.1986	-15.9496	-18.6294	0.0193431	1.72255
23.02.2012-24.02.2012	Control1	control	zooplankton+krill_day1	NA	NA	NA	NA	NA	1.32019	NA	NA	NA	NA	NA	-0.186186	NA	NA	NA	NA	NA	NA	NA	0.229723	NA	NA	NA	NA	-0.169066	NA	NA	NA	NA	-0.147665	NA	NA	NA	NA	-0.00264841	NA	NA	NA	NA	2.1917	NA	NA	NA	NA	-0.0638204	NA
23.02.2012-24.02.2012	Control2	control	zooplankton+krill_day1	NA	NA	NA	NA	NA	6.7602	NA	NA	NA	NA	NA	1.19739	NA	NA	NA	NA	NA	NA	NA	0.0853619	NA	NA	NA	NA	-0.195296	NA	NA	NA	NA	0.155817	NA	NA	NA	NA	0.029479	NA	NA	NA	NA	4.65292	NA	NA	NA	NA	-0.0740379	NA
23.02.2012-24.02.2012	Control3	control	zooplankton+krill_day1	NA	NA	NA	NA	NA	4.23654	NA	NA	NA	NA	NA	0.519382	NA	NA	NA	NA	NA	NA	NA	0.167671	NA	NA	NA	NA	-0.2307	NA	NA	NA	NA	NA	NA	NA	NA	NA	NA	NA	NA	NA	NA	-3.37707	NA	NA	NA	NA	-0.0277025	NA
24.02.2012-25.02.2012	X1	I	zooplankton+krill_day2	2.78496	0.30756	2.4774	1.86785	0.279243	NA	NA	0	0	0	0	NA	NA	0	0	0	0	NA	NA	3.1017	50.2713	26.914	18.051	20.2919	0.272932	6.1633	3.29968	2.21306	2.48781	-0.114146	2.1998	1.17772	0.789883	0.887944	0.0350986	0.461765	0.247217	0.165806	0.186391	12.2068	32.6052	17.456	11.7076	13.161	-0.2323	4.14971
24.02.2012-25.02.2012	X2	I	zooplankton+krill_day2	4.41576	0.31885	4.09691	1.88053	0.287379	NA	NA	0	0	0	0	NA	NA	0	0	0	0	NA	NA	2.76609	43.7035	23.24	9.89716	10.6674	0.265994	5.99678	3.18888	1.35804	1.46373	-0.0546179	1.03756	0.55174	0.234968	0.253255	0.0212916	0.730942	0.38869	0.16553	0.178413	-1.65128	336.623	179.005	76.2321	82.165	-0.43968	0.156495
24.02.2012-25.02.2012	L9	I	zooplankton+krill_day2	5.32048	0.384	4.93648	3.62167	0.463852	NA	NA	0	0	0	0	NA	NA	0	0	0	0	NA	NA	4.49535	76.9396	21.2442	14.461	15.5859	0.838424	19.7351	5.44917	3.70927	3.9978	-0.658468	12.7354	3.51643	2.39365	2.57985	-0.103898	3.15279	0.870535	0.592576	0.638672	-6.68065	65.8325	18.1774	12.3734	13.3359	0.00744887	-3.86421
24.02.2012-25.02.2012	X5	I	zooplankton+krill_day2	5.2982	0.2862	5.012	2.20829	0.356731	NA	NA	0	0	0	0	NA	NA	0	0	0	0	NA	NA	3.57022	59.2543	26.8327	11.1839	11.8225	0.3096	7.04333	3.1895	1.32938	1.40529	-0.193275	3.73401	1.69091	0.704769	0.745013	0.0120048	0.910012	0.412089	0.171759	0.181567	-3.22116	-31.7848	-14.3934	-5.99917	-6.34174	-0.171638	4.82264
24.02.2012-25.02.2012	L1	I	zooplankton+krill_day2	8.14127	0.46552	7.67575	3.11103	0.500533	NA	NA	0	0	0	0	NA	NA	0	0	0	0	NA	NA	3.81326	63.9679	20.5616	7.85724	8.33376	0.528908	12.3067	3.95583	1.51165	1.60332	-0.352012	6.82188	2.1928	0.837939	0.888758	-0.0878491	2.85283	0.917004	0.350416	0.371668	-6.2318	35.5418	11.4244	4.36564	4.63041	-0.697209	1.33651
24.02.2012-25.02.2012	L5	I	zooplankton+krill_day2	2.88956	0.41565	2.47391	2.28172	0.313005	NA	NA	0	0	0	0	NA	NA	0	0	0	0	NA	NA	2.82097	44.7853	19.6279	15.499	18.103	0.848673	19.9811	8.75704	6.91491	8.0767	-0.199438	3.86384	1.69339	1.33717	1.56183	-0.0153051	1.44527	0.633415	0.50017	0.584205	-4.71675	-23.1073	-10.1272	-7.99682	-9.34039	-0.136905	-8.91576
24.02.2012-25.02.2012	Control1	control	zooplankton+krill_day2	NA	NA	NA	NA	NA	NA	NA	NA	0	NA	NA	NA	NA	NA	0	NA	NA	NA	NA	0.596136	NA	NA	NA	NA	-0.0394509	NA	NA	NA	NA	0.0516509	NA	NA	NA	NA	0.0530368	NA	NA	NA	NA	-3.28149	NA	NA	NA	NA	-0.20504	NA
24.02.2012-25.02.2012	Control2	control	zooplankton+krill_day2	NA	NA	NA	NA	NA	NA	NA	NA	0	NA	NA	NA	NA	NA	0	NA	NA	NA	NA	0.560932	NA	NA	NA	NA	0.0478632	NA	NA	NA	NA	0.0176635	NA	NA	NA	NA	0.0955483	NA	NA	NA	NA	-7.14474	NA	NA	NA	NA	-0.379018	NA
24.02.2012-25.02.2012	Control3	control	zooplankton+krill_day2	NA	NA	NA	NA	NA	NA	NA	NA	0	NA	NA	NA	NA	NA	0	NA	NA	NA	NA	0.420784	NA	NA	NA	NA	0.0399719	NA	NA	NA	NA	-0.073619	NA	NA	NA	NA	0.0276888	NA	NA	NA	NA	8.72888	NA	NA	NA	NA	-0.0591414	NA
25.02.2012-26.02.2012	L2	II	unfed	2.46318	0.335467	2.12771	1.45401	0.208454	NA	NA	0	0	0	0	NA	NA	0	0	0	0	NA	NA	1.8008	32.7749	22.541	13.3059	15.4038	0.0795732	3.07341	2.11374	1.24774	1.44447	-0.273361	3.12596	2.14988	1.26908	1.46917	-0.0351374	0.508982	0.350053	0.206637	0.239216	-1.92944	115.57	79.483	46.9189	54.3164	0.0172439	-2.60946
25.02.2012-26.02.2012	L3	II	unfed	4.8246	0.211833	4.61276	1.97222	0.320497	NA	NA	0	0	0	0	NA	NA	0	0	0	0	NA	NA	2.04452	37.4349	18.9811	7.75917	8.1155	0.0757009	2.98047	1.51123	0.617766	0.646136	-0.241112	2.4882	1.26163	0.515732	0.539416	-0.0284977	0.378058	0.191692	0.0783606	0.0819592	5.32894	-92.6079	-46.9562	-19.195	-20.0764	0.0381566	-1.11246
25.02.2012-26.02.2012	L4	II	unfed	11.9905	0.33946	11.6511	3.19998	0.456918	NA	NA	0	0	0	0	NA	NA	0	0	0	0	NA	NA	3.01571	55.9273	17.4774	4.66429	4.80019	0.156688	4.92416	1.53881	0.410671	0.422636	-0.482349	7.13558	2.22988	0.595101	0.61244	-0.0480525	0.753378	0.235432	0.0628311	0.0646617	0.576933	48.551	15.1723	4.04911	4.16709	-0.0642836	-0.699047
25.02.2012-26.02.2012	L7	II	unfed	3.02619	0.262583	2.7636	2.0149	0.30893	NA	NA	0	0	0	0	NA	NA	0	0	0	0	NA	NA	2.01205	36.8251	18.2764	12.1688	13.325	0.108197	3.76037	1.86628	1.24261	1.36068	-0.161952	0.945096	0.469054	0.312306	0.341979	-0.00238511	-0.131253	-0.0651413	-0.0433724	-0.0474935	1.27858	-43.7586	-21.7175	-14.46	-15.8339	0.0255075	-2.70406
25.02.2012-26.02.2012	Control1	control	unfed	NA	NA	NA	NA	NA	NA	NA	NA	0	NA	NA	NA	NA	NA	0	NA	NA	NA	NA	0.0818828	NA	NA	NA	NA	-0.0515284	NA	NA	NA	NA	-0.125889	NA	NA	NA	NA	0.0119019	NA	NA	NA	NA	2.69717	NA	NA	NA	NA	-0.00133018	NA
25.02.2012-26.02.2012	Control2	control	unfed	NA	NA	NA	NA	NA	NA	NA	NA	0	NA	NA	NA	NA	NA	0	NA	NA	NA	NA	0.160954	NA	NA	NA	NA	-0.0652361	NA	NA	NA	NA	-0.0719725	NA	NA	NA	NA	-0.0130845	NA	NA	NA	NA	4.48243	NA	NA	NA	NA	0.198691	NA
25.02.2012-26.02.2012	Control3	control	unfed	NA	NA	NA	NA	NA	NA	NA	NA	0	NA	NA	NA	NA	NA	0	NA	NA	NA	NA	0.131865	NA	NA	NA	NA	-0.028692	NA	NA	NA	NA	-0.142698	NA	NA	NA	NA	-0.0261514	NA	NA	NA	NA		NA	NA	NA	NA	0.198691	NA
zooplankton (batch I+II)		mean		5.44146	0.362151	5.07931	2.66835	0.388924	28.7832	NA	44.6835	18.836	9.62248	10.5001	5.82979	NA		3.95307	1.99919	2.179	206.868	312.132	3.90138	69.0918	27.4729	14.2536	15.5984	0.381433	7.65821	3.18898	1.60446	1.75951	-1.2889	20.1637	8.16827	4.01497	4.34626	-0.216602	4.28245	1.66634	0.861531	0.941472	2.83495	29.6413	12.0051	9.94795	11.4706	0.240305	5.64149
		standard deviation		2.67177	0.135811	2.64352	1.0821	0.143961	11.2283	NA	20.2156	11.4793	6.71947	7.54416	2.18981	NA		2.32546	1.3046	1.45976	74.1268	147.657	1.1409	20.236	5.80992	4.28113	5.08144	0.112283	2.1528	1.33174	0.638444	0.751358	0.889701	15.6644	5.97022	2.96118	3.21909	0.122134	2.19692	0.67931	0.392333	0.445608	5.40577	94.2066	40.5135	28.7798	33.2862	0.419993	8.51135
zooplankton (batch I)		mean		4.80837	0.362963	4.44541	2.49518	0.36679	31.2878	NA	52.264	23.2632	12.8797	14.1992	5.83566	NA		4.56946	2.51762	2.77576	197.656	285.253	3.51322	63.4367	26.1108	14.4441	15.9148	0.361229	7.51468	3.24272	1.72358	1.89719	-0.697889	12.4102	5.19831	2.87434	3.14537	-0.163224	3.26713	1.36048	0.812187	0.903236	4.80771	62.4734	27.9332	19.4604	22.3724	0.135073	4.84114
		standard deviation		1.97689	0.070206	1.94312	0.713789	0.0940987	12.9541	NA	21.3064	13.9964	8.45047	9.53638	2.25336	NA		2.74247	1.62705	1.83642	39.2884	71.6428	0.669067	12.4963	4.08093	4.08475	4.96288	0.105515	1.9657	1.42331	0.596747	0.687254	0.287245	6.9388	2.96519	1.96228	2.19146	0.066005	1.10354	0.57089	0.506303	0.589715	6.6882	115.828	50.5261	38.849	45.3669	0.230947	4.80705
zooplankton (batch II)		mean		5.98411	0.361454	5.62266	2.81679	0.407896	26.6364	NA	38.1859	15.0412	6.8306	7.32953	5.82476	NA		3.42473	1.55481	1.66749	214.764	335.171	4.23409	73.9391	28.6404	14.0903	15.3271	0.398751	7.78123	3.14293	1.50236	1.64149	-1.79549	26.8095	10.7139	4.99266	5.3756	-0.262355	5.15272	1.9285	0.903826	0.974246	1.14402	1.49941	-1.64755	1.79444	2.12621	0.330504	6.32751
		standard deviation		3.20556	0.181055	3.17549	1.3644	0.182101	10.0329	NA	18.2296	7.99356	3.33029	3.55419	2.31497	NA		1.96018	0.835897	0.888864	97.7019	194.9	1.39659	25.0891	7.08424	4.76283	5.56156	0.123203	2.4517	1.36143	0.701509	0.836823	0.93042	18.4114	6.89775	3.45141	3.74763	0.144608	2.59299	0.691085	0.299516	0.323442	3.73367	67.5856	26.1555	15.1923	16.7359	0.536448	11.1553
zooplankton+krill_day1 (batch I)		mean		4.80837	0.362963	4.44541	2.49518	0.36679	30.0553	128.724	170.824	67.891	38.201	42.0917	6.03663	30.7462		15.7995	8.91123	9.81869	NA	NA	4.66806	87.7168	35.3415	19.8106	21.8246	0.603731	19.25	7.47805	4.17069	4.58564	-1.05883	20.6968	8.68284	4.76814	5.27155	-0.220925	4.56281	1.89489	1.04365	1.15421	4.84944	27.6816	5.31755	1.48293	1.31102	0.0133121	1.59717
		standard deviation		1.97689	0.070206	1.94312	0.713789	0.0940987	4.94709	55.2973	60.9576	6.68959	12.5514	14.7593	0.666312	13.3035		1.81824	3.04638	3.55757	NA	NA	1.36882	26.3662	4.7285	6.38643	7.54697	0.352643	8.46343	1.24835	1.37789	1.5811	0.229145	4.45515	2.59087	1.84122	2.26087	0.0524447	1.01868	0.507195	0.405992	0.501809	5.20394	101.255	34.609	15.9286	17.3302	0.202791	3.93519
zooplankton+krill_day2 (batch I)		mean		4.80837	0.362963	4.44541	2.49518	0.36679	NA	NA	0	0	0	0	NA	NA		0	0	0	NA	NA	3.42793	56.487	23.0701	12.8249	14.1341	0.510755	11.871	4.64001	2.83938	3.17244	-0.261993	5.06541	1.80383	1.04973	1.15278	-0.0231096	1.59227	0.578159	0.324376	0.356819	-1.7158	69.285	33.5903	15.1138	16.2684	-0.278381	-0.385769
		standard deviation		1.97689	0.070206	1.94312	0.713789	0.0940987	NA	NA	0	0	0	0	NA	NA		0	0	0	NA	NA	0.666481	12.8134	3.17606	3.82314	4.62135	0.275251	6.60602	2.19449	2.19072	2.5964	0.218538	4.23238	1.00688	0.746184	0.814753	0.0589434	1.14291	0.274355	0.188245	0.211165	7.07333	136.174	72.5922	31.1446	33.6544	0.251661	5.21189
unfed (batch II)		mean		5.98411	0.361454	5.62266	2.81679	0.407896	NA	NA	0	0	0	0	NA	NA		0	0	0	NA	NA	2.75018	48.9229	18.5389	9.19444	10.0062	0.103997	3.11382	1.48168	0.642219	0.688901	-0.283732	3.7803	1.42057	0.666477	0.729644	-0.0494241	0.527613	0.181034	0.0890845	0.097829	3.32504	25.4623	8.51764	5.41089	6.382	-0.043469	-0.0838621
		standard deviation		3.20556	0.181055	3.17549	1.3644	0.182101	NA	NA	0	0	0	0	NA	NA		0	0	0	NA	NA	1.25279	22.7582	4.7294	3.44449	3.99305	0.166566	4.06036	1.34376	0.746925	0.836985	0.102354	2.01967	0.651574	0.311904	0.378135	0.032628	0.422586	0.127954	0.0810356	0.0921854	3.77684	78.3904	39.53	21.7997	24.6084	0.192137	4.1413
[truncated: 13 more columns]

## Sheet: 1.3_CN_uptake
Date of measurement	ID	Batch	treatment	Feeding time	POC t0	POC t1	POC flux	PON t0	PON t1	PON flux	total volume	coral volume	SCHOTT bottle volume
				[h]	[μmol C L-1]	[μmol C L-1]	[μmol C L-1]	[μmol N L-1]	[μmol N L-1]	[μmol N L-1]	[L]	[L]	[L]
11.02.2012	X8	II	Zoopl-fed	2.01667	160.229	88.4539	35.5907	30.2299	14.5029	7.79852	0.803079	15.9213	0.819
11.02.2012	X10	II	Zoopl-fed	2	158.671	97.7228	30.4739	29.9251	16.5782	6.67344	0.811654	7.34568	0.819
11.02.2012	L8	II	Zoopl-fed	2	159.222	112.333	23.4443	30.0329	21.162	4.43549	0.8086	10.4004	0.819
11.02.2012	Control1	control	Zoopl-fed	2.41667	157.362	131.297	10.7854	29.6691	24.5051	2.13684	0.819	0	0.819
11.02.2012	Control2	control	Zoopl-fed	2.65	157.362	135.245	8.34609	29.6691	24.2565	2.0425	0.819	0	0.819
11.02.2012	Control3	control	Zoopl-fed	2.61667	157.362	144.313	4.98668	29.6691	27.6803	0.760041	0.819	0	0.819
12.02.2012	X1	I	Zoopl-fed	2.01667	196.006	102.385	46.4237	36.423	19.373	8.45456	0.813216	5.78433	0.819
12.02.2012	X2	I	Zoopl-fed	2.01667	196.08	104.085	45.6172	36.4372	19.1272	8.58349	0.812887	6.11347	0.819
12.02.2012	L9	I	Zoopl-fed	2	197.273	128.73	34.2713	36.6653	25.3302	5.66753	0.807631	11.3685	0.819
12.02.2012	Control1	control	Zoopl-fed	2.88333	194.712	203.298	-2.97805	36.1755	37.5007	-0.459608	0.819	0	0.819
12.02.2012	Control2	control	Zoopl-fed	2.53333	194.712	198.972	-1.68181	36.1755	39.1325	-1.16724	0.819	0	0.819
12.02.2012	Control3	control	Zoopl-fed	2.81667	194.712	187.838	2.44034	36.1755	37.079	-0.320769	0.819	0	0.819
14.02.2012	L4	II	Zoopl-fed	2	199.853	122.612	38.6203	36.0041	19.9391	8.03251	0.806107	12.8928	0.819
14.02.2012	L3	II	Zoopl-fed	2	198.369	141.433	28.4681	35.7296	21.0682	7.33073	0.81255	6.45013	0.819
14.02.2012	L7	II	Zoopl-fed	2	198.251	155.923	21.164	35.7077	25.9737	4.86699	0.813068	5.9318	0.819
14.02.2012	Control1	control	Zoopl-fed	2.36667	196.907	209.291	-5.23266	35.4591	38.9729	-1.48472	0.819	0	0.819
14.02.2012	Control2	control	Zoopl-fed	2.56667	196.907	231.601	-13.5169	35.4591	41.0885	-2.19327	0.819	0	0.819
14.02.2012	Control3	control	Zoopl-fed	2.53333	196.907	165.135	12.5417	35.4591	29.3213	2.42283	0.819	0	0.819
17.02.2012	X5	I	Zoopl-fed	2.01667	113.976	62.7152	25.4185	19.3277	8.94007	5.1509	0.811008	7.992	0.819
17.02.2012	L1	I	Zoopl-fed	2	114.003	73.9997	20.0015	19.3325	11.4074	3.96254	0.810792	8.20785	0.819
17.02.2012	L5	I	Zoopl-fed	2.01667	113.717	81.4616	15.9944	19.2818	12.8387	3.19496	0.813087	5.913	0.819
17.02.2012	Control1	control	Zoopl-fed	2.38333	112.988	112.533	0.191167	19.1526	19.6045	-0.189616	0.819	0	0.819
17.02.2012	Control2	control	Zoopl-fed	2.63333	112.988	109.123	1.46765	19.1526	18.2174	0.355125	0.819	0	0.819
17.02.2012	Control3	control	Zoopl-fed	2.61667	112.988	122.87	-3.77635	19.1526	21.0977	-0.743356	0.819	0	0.819
18.02.2012	L2	II	Zoopl-fed	2.01667	124.787	107.255	8.69352	20.5093	17.2108	1.63559	0.814859	4.1412	0.819
18.02.2012	Control1	control	Zoopl-fed	2.66667	124.221	111.272	4.85574	20.4125	17.962	0.918945	0.819	0	0.819
18.02.2012	Control2	control	Zoopl-fed	2.65	124.221	127.235	-1.13734	20.4125	22.5095	-0.791301	0.819	0	0.819
18.02.2012	Control3	control	Zoopl-fed	2.86667	124.221	103.777	7.13174	20.4125	17.6738	0.955378	0.819	0	0.819
23.02.2012	X1	I	Krill-fed	2	125.515	82.8942	21.3106	23.5103	12.2465	5.63193	0.813216	5.78433	0.819
23.02.2012	X2	I	Krill-fed	2	125.561	64.1499	30.7055	23.5193	11.8762	5.82156	0.812887	6.11347	0.819
23.02.2012	L9	I	Krill-fed	2	126.295	54.2319	36.0315	23.6633	9.52272	7.0703	0.807631	11.3685	0.819
23.02.2012	X5	I	Krill-fed	2	125.822	67.0481	29.3871	23.5706	12.2137	5.67843	0.811008	7.992	0.819
23.02.2012	L1	I	Krill-fed	2	125.852	59.6594	33.0965	23.5765	10.2849	6.64576	0.810792	8.20785	0.819
23.02.2012	L5	I	Krill-fed	2	125.533	65.9317	29.8007	23.5138	12.7702	5.3718	0.813087	5.913	0.819
23.02.2012	Control1	control	Krill-fed	2.78333	124.719	121.044	1.32019	23.354	23.8722	-0.186186	0.819	0	0.819
23.02.2012	Control2	control	Krill-fed	2.76667	124.719	106.016	6.7602	23.354	20.0412	1.19739	0.819	0	0.819
23.02.2012	Control3	control	Krill-fed	2.95	124.719	112.221	4.23654	23.354	21.8219	0.519382	0.819	0	0.819

## Sheet: 1.4_Zooplankton_capture
Date of measurement	ID	Batch	treatment & incubation	total bottle volume	Feeding time	zooplankton t0	sample replicates	zooplankton t0	zooplankton t1	zooplankton flux	zooplankton capture		POC t0	PON t0	C content zooplankton	N content zooplankton
				[L]	[h]	[zoopl bottle-1]		[zoopl L-1]	[zoopl bottle-1]	[zoopl bottle-1 h-1]	[total captured zoopl]	[captured zoopl h-1]	[μmol C (50 mL food portion)-1]	[μmol N (50 mL food portion)-1]	[μmol C zooplankter-1]	[μmol N zooplankter-1]
11.02.2012-12.02.2012	X8	II	zooplankton	0.803079	2.01667	734	2	913.983	288	221.157	383.349	191.675	118.428	23.1672	0.161346	0.031563
11.02.2012-12.02.2013	X10	II	zooplankton	0.811654	2	734	2	904.326	349.936	192.032	321.931	160.965	NA	NA	NA	NA
11.02.2012-12.02.2014	L8	II	zooplankton	0.8086	2	734	2	907.742	559.179	87.4103	112.688	56.3439	NA	NA	NA	NA
11.02.2012-12.02.2015	Control1	control	zooplankton	0.819	2.41667	734	2	896.215	658.923	31.0665	NA	NA	NA	NA	NA	NA
11.02.2012-12.02.2016	Control2	control	zooplankton	0.819	NA	734	2	896.215	NA	NA	NA	NA	NA	NA	NA	NA
11.02.2012-12.02.2017	Control3	control	zooplankton	0.819	NA	734	2	896.215	NA	NA	NA	NA	NA	NA	NA	NA
12.02.2012-13.02.2012	X1	I	zooplankton	0.813216	2.01667	931.5	2	1145.45	423.44	251.93	383.548	191.774	149.017	28.496	0.159975	0.0305915
12.02.2012-13.02.2013	X2	I	zooplankton	0.812887	2.01667	931.5	2	1145.92	498.086	214.916	308.903	154.452	NA	NA	NA	NA
12.02.2012-13.02.2014	L9	I	zooplankton	0.807631	2	931.5	2	1153.37	534.964	198.268	273.054	136.527	NA	NA	NA	NA
12.02.2012-13.02.2015	Control1	control	zooplankton	0.819	2.88333	931.5	2	1137.36	753.48	61.741	NA	NA	NA	NA	NA	NA
12.02.2012-13.02.2016	Control2	control	zooplankton	0.819	NA	931.5	2	1137.36	NA	NA	NA	NA	NA	NA	NA	NA
12.02.2012-13.02.2017	Control3	control	zooplankton	0.819	NA	931.5	2	1137.36	NA	NA	NA	NA	NA	NA	NA	NA
14.02.2012-15.02.2012	L4	II	zooplankton	0.806107	2	1221	2	1514.69	631.002	294.999	480.279	240.14	150.816	27.9093	0.123518	0.0228577
14.02.2012-15.02.2013	L3	II	zooplankton	0.81255	2	1221	2	1502.68	563.993	328.503	547.288	273.644	NA	NA	NA	NA
14.02.2012-15.02.2014	L7	II	zooplankton	0.813068	2	1221	2	1501.72	642.46	289.27	468.822	234.411	NA	NA	NA	NA
14.02.2012-15.02.2015	Control1	control	zooplankton	0.819	2.56667	1221	2	1490.84	1080.19	54.8592	NA	NA	NA	NA	NA	NA
14.02.2012-15.02.2016	Control2	control	zooplankton	0.819	NA	1221	2	1490.84	NA	NA	NA	NA	NA	NA	NA	NA
14.02.2012-15.02.2017	Control3	control	zooplankton	0.819	NA	1221	2	1490.84	NA	NA	NA	NA	NA	NA	NA	NA
17.02.2012-18.02.2012	X5	I	zooplankton	0.811008	2.01667	517	2	637.478	80.808	216.294	335.33	167.665	82.0857	14.5542	0.158773	0.0281513
17.02.2012-18.02.2013	L1	I	zooplankton	0.810792	2	517	2	637.648	209.061	153.97	207.912	103.956	NA	NA	NA	NA
17.02.2012-18.02.2014	L5	I	zooplankton	0.813087	2.01667	517	2	635.848	213.371	150.56	202.767	101.384	NA	NA	NA	NA
17.02.2012-18.02.2015	Control1	control	zooplankton	0.819	2.38333	517	2	631.258	397.8	50.014	NA	NA	NA	NA	NA	NA
17.02.2012-18.02.2016	Control2	control	zooplankton	0.819	NA	517	2	631.258	NA	NA	NA	NA	NA	NA	NA	NA
17.02.2012-18.02.2017	Control3	control	zooplankton	0.819	NA	517	2	631.258	NA	NA	NA	NA	NA	NA	NA	NA
18.02.2012-19.02.2014	L2	II	zooplankton	0.814859	2.01667	593	2	727.733	411.547	89.9764	31.8417	15.9208	91.2853	15.5861	0.153938	0.0262835
18.02.2012-19.02.2016	Control1	Zoopl-fed	zooplankton	0.819	2.66667	593	2	724.054	395.167	74.1872	NA	NA	NA	NA	NA	NA
18.02.2012-19.02.2017	Control2	Zoopl-fed	zooplankton	0.819	NA	593	2	724.054	NA	NA	NA	NA	NA	NA	NA	NA
18.02.2012-19.02.2018	Control3	Zoopl-fed	zooplankton	0.819	NA	593	2	724.054	NA	NA	NA	NA	NA	NA	NA	NA
						799.3		1025.28
						283.648		331.85

## Sheet: 1.5_Oxygen
Date of measurement	ID	Batch	treatment & incubation	Incubation time	O2 t0	O2 t1	O2 flux	total volume	coral volume	SCHOTT bottle volume
				[h]	[μmol O2 L-1]	[μmol O2 L-1]	[µmol O2 L-1 h-1]	[L]	[L]	[L]
11.02.2012 - 12.02.2012	X8	II	zooplankton	10.3	240.015	168.761	6.91791	0.803079	15.9213	0.819
11.02.2012 - 12.02.2013	X10	II	zooplankton	10.4833	240.015	198.762	3.93506	0.811654	7.34568	0.819
11.02.2012 - 12.02.2014	L8	II	zooplankton	10.0333	240.015	200.638	3.92466	0.8086	10.4004	0.819
11.02.2012 - 12.02.2015	Control 1	control	zooplankton	10.6333	240.015	235.952	0.382077	0.819	0	0.819
11.02.2012 - 12.02.2016	Control 2	control	zooplankton	10.7833	240.015	233.765	0.579634	0.819	0	0.819
11.02.2012 - 12.02.2017	Control 3	control	zooplankton	10.8833	240.015	234.077	0.545593	0.819	0	0.819
12.02.2012 - 13.02.2012	X1	I	zooplankton	10.1333	272.517	240.328	3.1766	0.813216	5.78433	0.819
12.02.2012 - 13.02.2012	X2	I	zooplankton	10.2833	272.517	240.015	3.16065	0.812887	6.11347	0.819
12.02.2012 - 13.02.2012	L9	I	zooplankton	10.0167	272.517	225.639	4.67999	0.807631	11.3685	0.819
12.02.2012 - 13.02.2012	Control1	control	zooplankton	10.3833	272.517	270.017	0.240786	0.819	0	0.819
12.02.2012 - 13.02.2012	Control2	control	zooplankton	10.4833	272.517	269.079	0.327922	0.819	0	0.819
12.02.2012 - 13.02.2012	Control3	control	zooplankton	10.6	272.517	267.829	0.442245	0.819	0	0.819
14.02.2012-15.02.2012	L4	II	zooplankton	10.2833	257.829	206.263	5.01449	0.806107	12.8928	0.819
14.02.2012-15.02.2012	L3	II	zooplankton	10.4667	257.829	219.389	3.6726	0.81255	6.45013	0.819
14.02.2012-15.02.2012	L7	II	zooplankton	10.55	257.829	218.764	3.70284	0.813068	5.9318	0.819
14.02.2012-15.02.2012	Control1	control	zooplankton	10.6333	257.829	253.453	0.411468	0.819	0	0.819
14.02.2012-15.02.2012	Control2	control	zooplankton	10.7	257.829	252.516	0.496526	0.819	0	0.819
14.02.2012-15.02.2012	Control3	control	zooplankton	10.8167	257.829	252.828	0.462279	0.819	0	0.819
17.02.2012-18.02.2012	X5	I	zooplankton	9.91667	257.204	221.264	3.62418	0.811008	7.992	0.819
17.02.2012-18.02.2012	L1	I	zooplankton	10.2333	257.204	219.389	3.69526	0.810792	8.20785	0.819
17.02.2012-18.02.2012	L5	I	zooplankton	10.4833	257.204	228.452	2.74262	0.813087	5.913	0.819
17.02.2012-18.02.2012	Control1	control	zooplankton	10.8	257.204	254.078	0.28937	0.819	0	0.819
17.02.2012-18.02.2012	Control2	control	zooplankton	11.0667	257.204	254.703	0.225918	0.819	0	0.819
17.02.2012-18.02.2012	Control3	control	zooplankton	11.2833	257.204	257.204	0	0.819	0	0.819
18.02.2012-19.02.2012	L2	II	zooplankton	10.75	297.831	271.267	2.47108	0.814859	4.1412	0.819
18.02.2012-19.02.2012	Control1	control	zooplankton	11.5167	297.831	296.269	0.135681	0.819	0	0.819
18.02.2012-19.02.2012	Control2	control	zooplankton	11.8	297.831	296.269	0.132424	0.819	0	0.819
18.02.2012-19.02.2012	Control3	control	zooplankton	12.1333	297.831	297.519	0.0257571	0.819	0	0.819
21.02.2012-22.02.2012	X8	II	unfed	9.65	311.582	259.079	5.44075	0.803079	15.9213	0.819
21.02.2012-22.02.2012	X10	II	unfed	9.93333	311.582	286.58	2.51694	0.811654	7.34568	0.819
21.02.2012-22.02.2012	L8	II	unfed	10.2	311.582	286.893	2.42049	0.8086	10.4004	0.819
21.02.2012-22.02.2012	Control1	control	unfed	10.4833	311.582	308.457	0.298111	0.819	0	0.819
21.02.2012-22.02.2012	Control2	control	unfed	10.7833	311.582	306.582	0.463707	0.819	0	0.819
21.02.2012-22.02.2012	Control3	control	unfed	11.0167	311.582	307.832	0.340415	0.819	0	0.819
23.02.2012-24.02.2012	X1	I	zooplankton+krill_day1	10.2667	302.519	261.266	4.01811	0.813216	5.78433	0.819
23.02.2012-24.02.2012	X2	I	zooplankton+krill_day1	9.6	302.519	270.329	3.35307	0.812887	6.11347	0.819
23.02.2012-24.02.2012	L9	I	zooplankton+krill_day1	9.16667	302.519	237.202	7.12545	0.807631	11.3685	0.819
23.02.2012-24.02.2012	X5	I	zooplankton+krill_day1	9.95	302.519	255.016	4.77417	0.811008	7.992	0.819
23.02.2012-24.02.2012	L1	I	zooplankton+krill_day1	9.36667	302.519	255.016	5.07149	0.810792	8.20785	0.819
23.02.2012-24.02.2012	L5	I	zooplankton+krill_day1	10.4	302.519	264.392	3.66609	0.813087	5.913	0.819
23.02.2012-24.02.2012	Control1	control	zooplankton+krill_day1	10.8833	302.519	300.019	0.229723	0.819	0	0.819
23.02.2012-24.02.2012	Control2	control	zooplankton+krill_day1	10.9833	302.519	301.581	0.0853619	0.819	0	0.819
23.02.2012-24.02.2012	Control3	control	zooplankton+krill_day1	11.1833	302.519	300.644	0.167671	0.819	0	0.819
24.02.2012-25.02.2012	X1	I	zooplankton+krill_day2	11.0833	264.392	230.014	3.1017	0.813216	5.78433	0.819
24.02.2012-25.02.2012	X2	I	zooplankton+krill_day2	10.7333	264.392	234.702	2.76609	0.812887	6.11347	0.819
24.02.2012-25.02.2012	L9	I	zooplankton+krill_day2	10.15	264.392	218.764	4.49535	0.807631	11.3685	0.819
24.02.2012-25.02.2012	X5	I	zooplankton+krill_day2	10.4167	264.392	227.202	3.57022	0.811008	7.992	0.819
24.02.2012-25.02.2012	L1	I	zooplankton+krill_day2	9.91667	264.392	226.577	3.81326	0.810792	8.20785	0.819
24.02.2012-25.02.2012	L5	I	zooplankton+krill_day2	11.3	264.392	232.515	2.82097	0.813087	5.913	0.819
24.02.2012-25.02.2012	Control1	control	zooplankton+krill_day2	11.5333	264.392	257.516	0.596136	0.819	0	0.819
24.02.2012-25.02.2012	Control2	control	zooplankton+krill_day2	11.7	264.392	257.829	0.560932	0.819	0	0.819
24.02.2012-25.02.2012	Control3	control	zooplankton+krill_day2	11.8833	264.392	259.391	0.420784	0.819	0	0.819
25.02.2012-26.02.2012	L2	II	unfed	10.9333	274.08	254.391	1.8008	0.814859	4.1412	0.819
25.02.2012-26.02.2012	L3	II	unfed	10.7	274.08	252.203	2.04452	0.81255	6.45013	0.819
25.02.2012-26.02.2012	L4	II	unfed	10.4667	274.08	242.515	3.01571	0.806107	12.8928	0.819
25.02.2012-26.02.2012	L7	II	unfed	11.1833	274.08	251.578	2.01205	0.813068	5.9318	0.819
25.02.2012-26.02.2012	Control1	control	unfed	11.45	274.08	273.142	0.0818828	0.819	0	0.819
25.02.2012-26.02.2012	Control2	control	unfed	11.65	274.08	272.205	0.160954	0.819	0	0.819
25.02.2012-26.02.2012	Control3	control	unfed	11.85	274.08	272.517	0.131865	0.819	0	0.819

## Sheet: 1.6_Ammonium
Date of measurement	ID	Batch	treatment & incubation	Incubation time	NH4+ t0	NH4+ t1	NH4+ flux	NO3- t0	NO3- t1	NO3- flux	NO2- t0	NO2- t1	NO2- flux	total volume	coral volume	SCHOTT bottle volume
				[h]	[μmol N L-1]	[μmol N L-1]	[μmol N L-1 h-1]	[μmol N L-1]	[μmol N L-1]	[μmol N L-1 h-1]	[μmol N L-1]	[μmol N L-1]	[μmol N L-1 h-1]	[L]	[L]	[L]
11.02.2012-12.02.2012	X8	II	zooplankton	10.3	1.035	6.97	0.576214	17.2283	18.6957	0.142465	0.184783	0.219565	0.00337695	0.803079	15.9213	0.819
11.02.2012-12.02.2013	X10	II	zooplankton	10.4833	1.035	4.555	0.335771	17.2283	17.7174	0.0466579	0.184783	0.204348	0.00186632	0.811654	7.34568	0.819
11.02.2012-12.02.2014	L8	II	zooplankton	10.0333	1.035	5.09	0.404153	17.2283	18.1522	0.0920844	0.184783	0.206522	0.00216669	0.8086	10.4004	0.819
11.02.2012-12.02.2015	Control1	control	zooplankton	10.6333	1.035	1.93	0.0841693	17.2283	17.7174	0.0459997	0.184783	0.186957	0.000204443	0.819	0	0.819
11.02.2012-12.02.2016	Control2	control	zooplankton	10.7833	1.035	2.18	0.106182	17.2283	18.0435	0.0755998	0.184783	0.236957	0.00483838	0.819	0	0.819
11.02.2012-12.02.2017	Control3	control	zooplankton	10.8833	1.035	1.535	0.0459418	17.2283	18.0978	0.0798988	0.184783	0.2	0.00139823	0.819	0	0.819
12.02.2012-13.02.2012	X1	I	zooplankton	10.1333	2.425	5.83	0.33602	11.6087	11.087	-0.0514874	0.669565	0.330435	-0.0334668	0.813216	5.78433	0.819
12.02.2012-13.02.2013	X2	I	zooplankton	10.2833	2.425	8.175	0.559157	11.6087	11.6304	0.00211402	0.669565	0.291304	-0.0367839	0.812887	6.11347	0.819
12.02.2012-13.02.2014	L9	I	zooplankton	10.0167	2.425	6.225	0.379368	11.6087	11.1957	-0.0412356	0.669565	0.293478	-0.0375461	0.807631	11.3685	0.819
12.02.2012-13.02.2015	Control1	control	zooplankton	10.3833	2.425	1.805	-0.0597111	11.6087	11.3043	-0.0293112	0.669565	0.747826	0.00753716	0.819	0	0.819
12.02.2012-13.02.2016	Control2	control	zooplankton	10.4833	2.425	2.24	-0.0176471	11.6087	12.1739	0.0539158	0.669565	0.473913	-0.0186632	0.819	0	0.819
12.02.2012-13.02.2017	Control3	control	zooplankton	10.6	2.425	6.195	0.35566	11.6087	12.1739	0.0533224	0.669565	0.321739	-0.0328138	0.819	0	0.819
14.02.2012-15.02.2012	L4	II	zooplankton	10.2833	0.35	5.445	0.495462	19.8804	20.5435	0.0644775	0.278261	0.143478	-0.0131069	0.806107	12.8928	0.819
14.02.2012-15.02.2013	L3	II	zooplankton	10.4667	0.35	4.895	0.434236	19.8804	20.4348	0.0529632	0.278261	0.182609	-0.00913874	0.81255	6.45013	0.819
14.02.2012-15.02.2014	L7	II	zooplankton	10.55	0.35	2.37	0.191469	19.8804	11.3587	-0.807748	0.278261	0.0826087	-0.0185452	0.813068	5.9318	0.819
14.02.2012-15.02.2015	Control1	control	zooplankton	10.6333	0.35	1.075	0.0681818	19.8804	20.2717	0.0367998	0.278261	0.282609	0.000408886	0.819	0	0.819
14.02.2012-15.02.2016	Control2	control	zooplankton	10.7	0.35	0.305	-0.00420561	19.8804	20.2717	0.0365705	0.278261	0.163043	-0.010768	0.819	0	0.819
14.02.2012-15.02.2017	Control3	control	zooplankton	10.8167	0.35	1.09	0.0684129	19.8804	20.4348	0.0512494	0.278261	0.158696	-0.0110538	0.819	0	0.819
17.02.2012-18.02.2012	X5	I	zooplankton	9.91667	0.52	3.63	0.313613	16.0326	16.0326	0	0.21087	0.197826	-0.00131531	0.811008	7.992	0.819
17.02.2012-18.02.2013	L1	I	zooplankton	10.2333	0.52	3.88	0.328339	16.0326	16.5217	0.0477978	0.21087	0.202174	-0.000849738	0.810792	8.20785	0.819
17.02.2012-18.02.2014	L5	I	zooplankton	10.4833	0.52	3.15	0.250874	16.0326	16.9022	0.0829474	0.21087	0.267391	0.00539158	0.813087	5.913	0.819
17.02.2012-18.02.2015	Control1	control	zooplankton	10.8	0.52	0.57	0.00462963	16.0326	16.6848	0.0603865	0.21087	0.202174	-0.000805153	0.819	0	0.819
17.02.2012-18.02.2016	Control2	control	zooplankton	11.0667	0.52	0.525	0.000451807	16.0326	16.0326	0	0.21087	0.204348	-0.000589314	0.819	0	0.819
17.02.2012-18.02.2017	Control3	control	zooplankton	11.2833	0.52	0.58	0.00531758	16.0326	16.087	0.00481665	0.21087	0.215217	0.000385332	0.819	0	0.819
18.02.2012-19.02.2014	L2	II	zooplankton	10.75	0.685	4.49	0.353953	10.0326	9.52174	-0.0475228	0.18913	0.21087	0.00202224	0.814859	4.1412	0.819
18.02.2012-19.02.2016	Control1	Zoopl-fed	zooplankton	11.5167	0.685	1.635	0.0824891	10.0326	9.15217	-0.0764488	0.18913	0.232609	0.00377525	0.819	0	0.819
18.02.2012-19.02.2017	Control2	Zoopl-fed	zooplankton	11.8	0.685	1.905	0.10339	10.0326	8.6413	-0.117907	0.18913	0.219565	0.00257922	0.819	0	0.819
18.02.2012-19.02.2018	Control3	Zoopl-fed	zooplankton	12.1333	0.685	0.435	-0.0206044	10.0326	7.72826	-0.189919	0.18913	0.204348	0.00125418	0.819	0	0.819
21.02.2012-22.02.2012	X8	II	unfed	9.65	5.5	8.315	0.29171	6.25	8.53261	0.23654	0.23913	0.197826	-0.00428024	0.803079	15.9213	0.819
21.02.2012-22.02.2013	X10	II	unfed	9.93333	5.5	7.895	0.241107	6.25	6.25	0	0.23913	0.202174	-0.00372046	0.811654	7.34568	0.819
21.02.2012-22.02.2014	L8	II	unfed	10.2	5.5	3.205	-0.225	6.25	6.19565	-0.00532822	0.23913	0.236957	-0.000213129	0.8086	10.4004	0.819
21.02.2012-22.02.2015	Control1	control	unfed	10.4833	5.5	3.075	-0.23132	6.25	5.70652	-0.0518421	0.23913	0.184783	-0.00518421	0.819	0	0.819
21.02.2012-22.02.2016	Control2	control	unfed	10.7833	5.5	6.865	0.126584	6.25	6.63043	0.0352799	0.23913	0.21087	-0.00262079	0.819	0	0.819
21.02.2012-22.02.2017	Control3	control	unfed	11.0167	5.5	6.805	0.118457	6.25	8.15217	0.172663	0.23913	0.191304	-0.00434125	0.819	0	0.819
23.02.2012-24.02.2012	X1	I	zooplankton+krill_day1	10.2667	3.875	7.55	0.357955	5.6087	7.28261	0.163043	0.221739	0.291304	0.00677583	0.813216	5.78433	0.819
23.02.2012-24.02.2013	X2	I	zooplankton+krill_day1	9.6	3.875	6.435	0.266667	5.6087	7.11957	0.157382	0.221739	0.247826	0.00271739	0.812887	6.11347	0.819
23.02.2012-24.02.2014	L9	I	zooplankton+krill_day1	9.16667	3.875	14.69	1.17982	5.6087	6.51087	0.098419	0.221739	0.226087	0.000474308	0.807631	11.3685	0.819
23.02.2012-24.02.2015	X5	I	zooplankton+krill_day1	9.95	3.875	9.385	0.553769	5.6087	7.81522	0.221761	0.221739	0.241304	0.00196635	0.811008	7.992	0.819
23.02.2012-24.02.2016	L1	I	zooplankton+krill_day1	9.36667	3.875	12.01	0.868505	5.6087	11.2283	0.599954	0.221739	0.280435	0.00626644	0.810792	8.20785	0.819
23.02.2012-24.02.2017	L5	I	zooplankton+krill_day1	10.4	3.875	7.99	0.395673	5.6087	7.07609	0.141095	0.221739	0.23913	0.00167224	0.813087	5.913	0.819
23.02.2012-24.02.2018	Control1	control	zooplankton+krill_day1	10.8833	3.875	2.035	-0.169066	5.6087	7.06522	0.13383	0.221739	0.226087	0.000399494	0.819	0	0.819
23.02.2012-24.02.2019	Control2	control	zooplankton+krill_day1	10.9833	3.875	1.73	-0.195296	5.6087	6.95652	0.122716	0.221739	0.241304	0.00178136	0.819	0	0.819
23.02.2012-24.02.2020	Control3	control	zooplankton+krill_day1	11.1833	3.875	1.295	-0.2307	5.6087	6.68478	0.0962224	0.221739	0.234783	0.00116633	0.819	0	0.819
24.02.2012-25.02.2012	X1	I	zooplankton+krill_day2	11.0833	0.495	3.52	0.272932	16.5978	16.9022	0.02746	0.208696	0.195652	-0.00117686	0.813216	5.78433	0.819
24.02.2012-25.02.2013	X2	I	zooplankton+krill_day2	10.7333	0.495	3.35	0.265994	16.5978	16.6848	0.00810154	0.208696	0.204348	-0.000405077	0.812887	6.11347	0.819
24.02.2012-25.02.2014	L9	I	zooplankton+krill_day2	10.15	0.495	9.005	0.838424	16.5978	17.4348	0.0824588	0.208696	0.241304	0.00321268	0.807631	11.3685	0.819
24.02.2012-25.02.2015	X5	I	zooplankton+krill_day2	10.4167	0.495	3.72	0.3096	16.5978	17.1739	0.0553043	0.208696	0.191304	-0.00166957	0.811008	7.992	0.819
24.02.2012-25.02.2016	L1	I	zooplankton+krill_day2	9.91667	0.495	5.74	0.528908	16.5978	18.7391	0.21593	0.208696	0.176087	-0.00328827	0.810792	8.20785	0.819
24.02.2012-25.02.2017	L5	I	zooplankton+krill_day2	11.3	0.495	10.085	0.848673	16.5978	17.2935	0.0615621	0.208696	0.195652	-0.00115429	0.813087	5.913	0.819
24.02.2012-25.02.2018	Control1	control	zooplankton+krill_day2	11.5333	0.495	0.04	-0.0394509	16.5978	17.0109	0.035813	0.208696	0.171739	-0.00320432	0.819	0	0.819
24.02.2012-25.02.2019	Control2	control	zooplankton+krill_day2	11.7	0.495	1.055	0.0478632	16.5978	17.2826	0.0585284	0.208696	0.215217	0.000557414	0.819	0	0.819
24.02.2012-25.02.2020	Control3	control	zooplankton+krill_day2	11.8833	0.495	0.97	0.0399719	16.5978	17.5109	0.076834	0.208696	0.2	-0.000731752	0.819	0	0.819
25.02.2012-26.02.2012	L2	II	unfed	10.9333	1.145	2.015	0.0795732	12.5	13.663	0.106376	0.273913	0.280435	0.000596501	0.814859	4.1412	0.819
25.02.2012-26.02.2013	L3	II	unfed	10.7	1.145	1.955	0.0757009	12.5	12.7609	0.0243803	0.273913	0.267391	-0.000609508	0.81255	6.45013	0.819
25.02.2012-26.02.2014	L4	II	unfed	10.4667	1.145	2.785	0.156688	12.5	12.9239	0.0405012	0.273913	0.25	-0.00228469	0.806107	12.8928	0.819
25.02.2012-26.02.2015	L7	II	unfed	11.1833	1.145	2.355	0.108197	12.5	12.913	0.0369338	0.273913	0.241304	-0.00291583	0.813068	5.9318	0.819
25.02.2012-26.02.2016	Control1	control	unfed	11.45	1.145	0.555	-0.0515284	12.5	12.9239	0.037023	0.273913	0.263043	-0.000949307	0.819	0	0.819
25.02.2012-26.02.2017	Control2	control	unfed	11.65	1.145	0.385	-0.0652361	12.5	13.3913	0.0765068	0.273913	0.243478	-0.00261243	0.819	0	0.819
25.02.2012-26.02.2018	Control3	control	unfed	11.85	1.145	0.805	-0.028692	12.5	13.2609	0.0642084	0.273913	0.263043	-0.000917263	0.819	0	0.819

## Sheet: 1.7_POC_PON
Date of measurement	ID	Batch	treatment & incubation	Incubation time	POC t0	POC t1	POC flux	PON t0	PON t1	PON flux	total volume	coral volume	SCHOTT bottle volume
				[h]	[μmol C L-1]	[μmol C L-1]	[μmol C L-1 h-1]	[μmol N L-1]	[μmol N L-1]	[μmol N L-1 h-1]	[L]	[L]	[L]
11.02.2012 - 12.02.2012	X8	II	zooplankton	10.3	12.8029	39.981	-2.63865	1.75721	6.70132	-0.480011	0.803079	15.9213	0.819
11.02.2012 - 12.02.2013	X10	II	zooplankton	10.4833	12.8029	29.3504	-1.57845	1.75721	4.37429	-0.249642	0.811654	7.34568	0.819
11.02.2012 - 12.02.2014	L8	II	zooplankton	10.0333	12.8029	25.2921	-1.24477	1.75721	3.74236	-0.197856	0.8086	10.4004	0.819
11.02.2012 - 12.02.2015	Control1	control	zooplankton	10.6333	12.8029	25.3529	-1.18025	1.75721	4.39313	-0.247893	0.819	0	0.819
11.02.2012 - 12.02.2016	Control2	control	zooplankton	10.7833	12.8029	19.5528	-0.625957	1.75721	-0.283081	0.189207	0.819	0	0.819
11.02.2012 - 12.02.2017	Control3	control	zooplankton	10.8833	12.8029	24.71	-1.09407	1.75721	1.74338	0.0012701	0.819	0	0.819
12.02.2012 - 13.02.2012	X1	I	zooplankton	10.1333	15.2154	22.9084	-0.759181	2.05585	4.5563	-0.246755	0.813216	5.78433	0.819
12.02.2012 - 13.02.2012	X2	I	zooplankton	10.2833	15.2154	19.8159	-0.447372	2.05585	3.01761	-0.093526	0.812887	6.11347	0.819
12.02.2012 - 13.02.2012	L9	I	zooplankton	10.0167	15.2154	25.3246	-1.00924	2.05585	4.48786	-0.242797	0.807631	11.3685	0.819
12.02.2012 - 13.02.2012	Control1	control	zooplankton	10.3833	15.2154	14.6635	0.053155	2.05585	2.27317	-0.0209295	0.819	0	0.819
12.02.2012 - 13.02.2012	Control2	control	zooplankton	10.4833	15.2154	16.2294	-0.0967278	2.05585	2.85355	-0.0760926	0.819	0	0.819
12.02.2012 - 13.02.2012	Control3	control	zooplankton	10.6	15.2154	11.6463	0.336709	2.05585	1.7143	0.0322211	0.819	0	0.819
14.02.2012-15.02.2012	L4	II	zooplankton	10.2833	9.1657	40.588	-3.05566	1.63623	5.99198	-0.423574	0.806107	12.8928	0.819
14.02.2012-15.02.2012	L3	II	zooplankton	10.4667	9.1657	30.0945	-1.99957	1.63623	3.97292	-0.223251	0.81255	6.45013	0.819
14.02.2012-15.02.2012	L7	II	zooplankton	10.55	9.1657	28.5502	-1.83739	1.63623	3.82884	-0.20783	0.813068	5.9318	0.819
14.02.2012-15.02.2012	Control1	control	zooplankton	10.6333	9.1657	10.4784	-0.123448	1.63623	1.51941	0.0109863	0.819	0	0.819
14.02.2012-15.02.2012	Control2	control	zooplankton	10.7	9.1657	9.07955	0.00805124	1.63623	1.03955	0.0557644	0.819	0	0.819
14.02.2012-15.02.2012	Control3	control	zooplankton	10.8167	9.1657	11.4708	-0.213103	1.63623	1.90211	-0.0245803	0.819	0	0.819
17.02.2012-18.02.2012	X5	I	zooplankton	9.91667	13.2384	23.548	-1.03963	2.1903	3.44255	-0.126278	0.811008	7.992	0.819
17.02.2012-18.02.2012	L1	I	zooplankton	10.2333	13.2384	19.1444	-0.577133	2.1903	3.38622	-0.116865	0.810792	8.20785	0.819
17.02.2012-18.02.2012	L5	I	zooplankton	10.4833	13.2384	16.9577	-0.354779	2.1903	3.7955	-0.15312	0.813087	5.913	0.819
17.02.2012-18.02.2012	Control1	control	zooplankton	10.8	13.2384	16.9332	-0.342109	2.1903	2.00255	0.0173834	0.819	0	0.819
17.02.2012-18.02.2012	Control2	control	zooplankton	11.0667	13.2384	15.9262	-0.24287	2.1903	2.26903	-0.00711455	0.819	0	0.819
17.02.2012-18.02.2012	Control3	control	zooplankton	11.2833	13.2384	14.0189	-0.069174	2.1903	1.26484	0.0820199	0.819	0	0.819
18.02.2012-19.02.2012	L2	II	zooplankton	10.75	21.8189	24.1186	-0.213924	3.39231	3.97624	-0.0543194	0.814859	4.1412	0.819
18.02.2012-19.02.2012	Control1	control	zooplankton	11.5167	21.8189	12.9459	0.770448	3.39231	1.75695	0.141999	0.819	0	0.819
18.02.2012-19.02.2012	Control2	control	zooplankton	11.8	21.8189	19.5677	0.190781	3.39231	3.59095	-0.0168338	0.819	0	0.819
18.02.2012-19.02.2012	Control3	control	zooplankton	12.1333	21.8189	21.6172	0.0166178	3.39231	3.53125	-0.0114511	0.819	0	0.819
21.02.2012-22.02.2012	X8	II	unfed	9.65	13.9029	16.6183	-0.28139	2.09762	3.08112	-0.101916	0.803079	15.9213	0.819
21.02.2012-22.02.2012	X10	II	unfed	9.93333	13.9029	16.0518	-0.216331	2.09762	2.62339	-0.0529289	0.811654	7.34568	0.819
21.02.2012-22.02.2012	L8	II	unfed	10.2	13.9029	17.2652	-0.329631	2.09762	2.88354	-0.0770505	0.8086	10.4004	0.819
21.02.2012-22.02.2012	Control1	control	unfed	10.4833	13.9029	20.0915	-0.590321	2.09762	3.38535	-0.122835	0.819	0	0.819
21.02.2012-22.02.2012	Control2	control	unfed	10.7833	13.9029	11.1748	0.252996	2.09762	2.01717	0.00746073	0.819	0	0.819
21.02.2012-22.02.2012	Control3	control	unfed	11.0167	13.9029	12.0433	0.168797	2.09762	2.13728	-0.00359946	0.819	0	0.819
25.02.2012-26.02.2012	L2	II	unfed	10.9333	7.67901	10.6678	-0.273361	1.51498	1.89915	-0.0351374	0.814859	4.1412	0.819
25.02.2012-26.02.2012	L3	II	unfed	10.7	7.67901	10.2589	-0.241112	1.51498	1.81991	-0.0284977	0.81255	6.45013	0.819
25.02.2012-26.02.2012	L4	II	unfed	10.4667	7.67901	12.7276	-0.482349	1.51498	2.01793	-0.0480525	0.806107	12.8928	0.819
25.02.2012-26.02.2012	L7	II	unfed	11.1833	7.67901	9.49018	-0.161952	1.51498	1.54165	-0.00238511	0.813068	5.9318	0.819
25.02.2012-26.02.2012	Control1	control	unfed	11.45	7.67901	9.12044	-0.125889	1.51498	1.3787	0.0119019	0.819	0	0.819
25.02.2012-26.02.2012	Control2	control	unfed	11.65	7.67901	8.51749	-0.0719725	1.51498	1.66741	-0.0130845	0.819	0	0.819
25.02.2012-26.02.2012	Control3	control	unfed	11.85	7.67901	9.36998	-0.142698	1.51498	1.82487	-0.0261514	0.819	0	0.819
23.02.2012-24.02.2012	X1	I	zooplankton+krill_day1	10.2667	11.0348	17.3595	-0.616048	1.80981	3.01172	-0.117069	0.813216	5.78433	0.819
23.02.2012-24.02.2012	X2	I	zooplankton+krill_day1	9.6	11.0348	21.6438	-1.10511	1.80981	3.92374	-0.220201	0.812887	6.11347	0.819
23.02.2012-24.02.2012	L9	I	zooplankton+krill_day1	9.16667	11.0348	20.976	-1.0845	1.80981	3.96614	-0.235236	0.807631	11.3685	0.819
23.02.2012-24.02.2012	X5	I	zooplankton+krill_day1	9.95	11.0348	23.6332	-1.26617	1.80981	4.27934	-0.248194	0.811008	7.992	0.819
23.02.2012-24.02.2012	L1	I	zooplankton+krill_day1	9.36667	11.0348	21.1513	-1.08005	1.80981	4.13624	-0.248373	0.810792	8.20785	0.819
23.02.2012-24.02.2012	L5	I	zooplankton+krill_day1	10.4	11.0348	23.5261	-1.20109	1.80981	4.47717	-0.256476	0.813087	5.913	0.819
23.02.2012-24.02.2012	Control1	control	zooplankton+krill_day1	10.8833	11.0348	12.6419	-0.147665	1.80981	1.83864	-0.00264841	0.819	0	0.819
23.02.2012-24.02.2012	Control2	control	zooplankton+krill_day1	10.9833	11.0348	9.32337	0.155817	1.80981	1.48604	0.029479	0.819	0	0.819
24.02.2012-25.02.2012	X1	I	zooplankton+krill_day2	11.0833	9.99481	11.2599	-0.114146	2.04834	1.65933	0.0350986	0.813216	5.78433	0.819
24.02.2012-25.02.2012	X2	I	zooplankton+krill_day2	10.7333	9.99481	10.581	-0.0546179	2.04834	1.81981	0.0212916	0.812887	6.11347	0.819
24.02.2012-25.02.2012	L9	I	zooplankton+krill_day2	10.15	9.99481	16.6783	-0.658468	2.04834	3.1029	-0.103898	0.807631	11.3685	0.819
24.02.2012-25.02.2012	X5	I	zooplankton+krill_day2	10.4167	9.99481	12.0081	-0.193275	2.04834	1.92329	0.0120048	0.811008	7.992	0.819
24.02.2012-25.02.2012	L1	I	zooplankton+krill_day2	9.91667	9.99481	13.4856	-0.352012	2.04834	2.91951	-0.0878491	0.810792	8.20785	0.819
24.02.2012-25.02.2012	L5	I	zooplankton+krill_day2	11.3	9.99481	12.2485	-0.199438	2.04834	2.22128	-0.0153051	0.813087	5.913	0.819
24.02.2012-25.02.2012	Control1	control	zooplankton+krill_day2	11.5333	9.99481	9.3991	0.0516509	2.04834	1.43664	0.0530368	0.819	0	0.819
24.02.2012-25.02.2012	Control2	control	zooplankton+krill_day2	11.7	9.99481	9.78815	0.0176635	2.04834	0.93042	0.0955483	0.819	0	0.819
24.02.2012-25.02.2012	Control3	control	zooplankton+krill_day2	11.8833	9.99481	10.8696	-0.073619	2.04834	1.7193	0.0276888	0.819	0	0.819

## Sheet: 1.8_DOC_DON
Date of measurement	ID	Batch	treatment & incubation	Incubation time	DOC t0	n	DOC t1	n	DOC flux	TDN t0	n	DIN t0	DON t0	TDN t1	n	DIN t1	DON t1	DON flux	total volume	coral volume	SCHOTT bottle volume
				[h]	[μmol C L-1]		[μmol C L-1]		[μmol C L-1 h-1]	[μmol N L-1]		[μmol N L-1]	[μmol N L-1]	[μmol N L-1]		[μmol N L-1]	[μmol N L-1]	[μmol N L-1 h-1]	[L]	[L]	[L]
11.02.2012 - 12.02.2012	X8	II	zooplankton	10.3	117.579	2	118.053	3	0.0459601	20.2178	3	18.5593	1.65843	26.2534	3	25.8852	0.368214	-0.125264	0.803079	15.9213	0.819
11.02.2012 - 12.02.2013	X10	II	zooplankton	10.4833	117.579		116.141	3	-0.137225	20.2178		18.5593	1.65843	24.3484	3	22.4767	1.8717	0.020344	0.811654	7.34568	0.819
11.02.2012 - 12.02.2014	L8	II	zooplankton	10.0333	117.579		203.056	3	8.51922	20.2178		18.5593	1.65843	27.6109	3	23.4487	4.16217	0.249542	0.8086	10.4004	0.819
11.02.2012 - 12.02.2015	Control1	control	zooplankton	10.6333	117.579		139.512	2	2.06262	20.2178		18.5593	1.65843	22.6339	3	19.8343	2.79958	0.107318	0.819	0	0.819
11.02.2012 - 12.02.2016	Control2	control	zooplankton	10.7833	117.579		132.437	3	1.37788	20.2178		18.5593	1.65843	22.3858	3	20.4604	1.92532	0.0247505	0.819	0	0.819
11.02.2012 - 12.02.2017	Control3	control	zooplankton	10.8833	117.579		176.728	3	5.43482	20.2178		18.5593	1.65843	23.1736	3	19.8328	3.34079	0.154581	0.819	0	0.819
12.02.2012 - 13.02.2012	X1	I	zooplankton	10.1333	116.685	2	121.116	3	0.437301	16.2737	3	14.7033	1.57039	19.0589	3	17.2474	1.81148	0.0237922	0.813216	5.78433	0.819
12.02.2012 - 13.02.2012	X2	I	zooplankton	10.2833	116.685		124.591	3	0.768842	16.2737		14.7033	1.57039	23.1897	3	20.0967	3.09291	0.148057	0.812887	6.11347	0.819
12.02.2012 - 13.02.2012	L9	I	zooplankton	10.0167	116.685		127.452	3	1.07492	16.2737		14.7033	1.57039	25.1904	3	17.7141	7.47624	0.589602	0.807631	11.3685	0.819
12.02.2012 - 13.02.2012	Control1	control	zooplankton	10.3833	116.685		119.019	3	0.224793	16.2737		14.7033	1.57039	15.5924	3	13.8572	1.73527	0.0158798	0.819	0	0.819
12.02.2012 - 13.02.2012	Control2	control	zooplankton	10.4833	116.685		116.012	3	-0.0641381	16.2737		14.7033	1.57039	16.5906	3	14.8878	1.70275	0.012626	0.819	0	0.819
12.02.2012 - 13.02.2012	Control3	control	zooplankton	10.6	116.685		129.864	3	1.24332	16.2737		14.7033	1.57039	15.5064	3	18.6907	-3.18429	-0.448555	0.819	0	0.819
14.02.2012-15.02.2012	L4	II	zooplankton	10.2833	137.448	3	114.962	3	-2.18661	24.0917	3	20.5087	3.58305	33.9419	3	26.132	7.80994	0.411043	0.806107	12.8928	0.819
14.02.2012-15.02.2012	L3	II	zooplankton	10.4667	137.448		122.915	1	-1.38847	24.0917		20.5087	3.58305	33.9287	3	25.5124	8.41635	0.46178	0.81255	6.45013	0.819
14.02.2012-15.02.2012	L7	II	zooplankton	10.55	137.448		175.864	3	3.64138	24.0917		20.5087	3.58305	32.3718	3	13.8113	18.5605	1.41966	0.813068	5.9318	0.819
14.02.2012-15.02.2012	Control1	control	zooplankton	10.6333	137.448		138.898	3	0.136419	24.0917		20.5087	3.58305	23.6509	3	21.6293	2.02157	-0.146847	0.819	0	0.819
14.02.2012-15.02.2012	Control2	control	zooplankton	10.7	137.448		111.332	3	-2.44072	24.0917		20.5087	3.58305	24.4835	3	20.7398	3.74369	0.0150132	0.819	0	0.819
14.02.2012-15.02.2012	Control3	control	zooplankton	10.8167	137.448		137.9	3	0.041759	24.0917		20.5087	3.58305	25.1417	3	21.6835	3.45818	-0.0115441	0.819	0	0.819
17.02.2012-18.02.2012	X5	I	zooplankton	9.91667	129.731	3	210.386	3	8.13328	22.5636	3	16.7635	5.80013	25.9894	3	19.8604	6.12895	0.0331588	0.811008	7.992	0.819
17.02.2012-18.02.2012	L1	I	zooplankton	10.2333	129.731		143.337	3	1.32962	22.5636		16.7635	5.80013	25.9832	3	20.6039	5.3793	-0.0411231	0.810792	8.20785	0.819
17.02.2012-18.02.2012	L5	I	zooplankton	10.4833	129.731		309.02	3	17.1023	22.5636		16.7635	5.80013	26.7167	3	20.3196	6.39716	0.0569509	0.813087	5.913	0.819
17.02.2012-18.02.2012	Control1	control	zooplankton	10.8	129.731		153.413	2	2.19275	22.5636		16.7635	5.80013	22.1052	2	17.457	4.64829	-0.106652	0.819	0	0.819
17.02.2012-18.02.2012	Control2	control	zooplankton	11.0667	129.731		180.811	3	4.61562	22.5636		16.7635	5.80013	21.3947	3	16.762	4.63273	-0.105488	0.819	0	0.819
17.02.2012-18.02.2012	Control3	control	zooplankton	11.2833	129.731		145.655	3	1.41126	22.5636		16.7635	5.80013	22.1039	3	16.8822	5.22173	-0.051261	0.819	0	0.819
18.02.2012-19.02.2012	L2	II	zooplankton	10.75	148.807	3	143.581	2	-0.486135	12.263	3	10.9067	1.35622	14.2503	3	14.2226	0.0277202	-0.123581	0.814859	4.1412	0.819
18.02.2012-19.02.2012	Control1	control	zooplankton	11.5167	148.807		175.786	2	2.34258	12.263		10.9067	1.35622	9.637	3	11.0198	-1.38279	-0.23783	0.819	0	0.819
18.02.2012-19.02.2012	Control2	control	zooplankton	11.8	148.807		156.443	2	0.647102	12.263		10.9067	1.35622	11.0721	3	10.7659	0.306219	-0.0889832	0.819	0	0.819
18.02.2012-19.02.2012	Control3	control	zooplankton	12.1333	148.807		144.482	2	-0.356462	12.263		10.9067	1.35622	9.98083	3	8.36761	1.61322	0.0211814	0.819	0	0.819
21.02.2012-22.02.2012	X8	II	unfed	9.65	128.158	3	221.588	3	9.68185	12.0191	3	11.9891	0.0300018	13.7408	3	17.0454	-3.30468	-0.345563	0.803079	15.9213	0.819
21.02.2012-22.02.2012	X10	II	unfed	9.93333	128.158		165.198	3	3.72884	12.0191		11.9891	0.0300018	12.1863	3	14.3472	-2.16088	-0.220559	0.811654	7.34568	0.819
21.02.2012-22.02.2012	L8	II	unfed	10.2	128.158		175.175	3	4.60956	12.0191		11.9891	0.0300018	12.1688	3	9.63761	2.53119	0.245214	0.8086	10.4004	0.819
21.02.2012-22.02.2012	Control1	control	unfed	10.4833	128.158		157.892	3	2.83632	12.0191		11.9891	0.0300018	9.88858	3	8.9663	0.922277	0.0851137	0.819	0	0.819
21.02.2012-22.02.2012	Control2	control	unfed	10.7833	128.158		211.293	2	7.70961	12.0191		11.9891	0.0300018	10.5332	3	13.7063	-3.17307	-0.297039	0.819	0	0.819
21.02.2012-22.02.2012	Control3	control	unfed	11.0167	128.158		124.616	2	-0.321545	12.0191		11.9891	0.0300018	10.2758	3	15.1485	-4.87267	-0.445023	0.819	0	0.819
25.02.2012-26.02.2012	L2	II	unfed	10.9333	140.709	3	236.144	3	8.72888	15.8358	3	13.9189	1.91685	17.2287	3	15.9585	1.27024	-0.0591414	0.814859	4.1412	0.819
25.02.2012-26.02.2012	L3	II	unfed	10.7	140.709		120.064	2	-1.92944	15.8358		13.9189	1.91685	17.0846	3	14.9833	2.10136	0.0172439	0.81255	6.45013	0.819
25.02.2012-26.02.2012	L4	II	unfed	10.4667	140.709		196.485	3	5.32894	15.8358		13.9189	1.91685	18.2751	3	15.9589	2.31623	0.0381566	0.806107	12.8928	0.819
25.02.2012-26.02.2012	L7	II	unfed	11.1833	140.709		147.161	2	0.576933	15.8358		13.9189	1.91685	16.7073	3	15.5093	1.19795	-0.0642836	0.813068	5.9318	0.819
25.02.2012-26.02.2012	Control1	control	unfed	11.45	140.709		155.348	3	1.27858	15.8358		13.9189	1.91685	15.9509	3	13.742	2.20891	0.0255075	0.819	0	0.819
25.02.2012-26.02.2012	Control2	control	unfed	11.65	140.709		172.131	3	2.69717	15.8358		13.9189	1.91685	15.9211	3	14.0198	1.90136	-0.00133018	0.819	0	0.819
25.02.2012-26.02.2012	Control3	control	unfed	11.85	140.709		193.825	2	4.48243	15.8358		13.9189	1.91685	18.6003	2	14.3289	4.27134	0.198691	0.819	0	0.819
23.02.2012-24.02.2012	X1	I	zooplankton+krill_day1	10.2667	121.949	2	155.275	3	3.24606	11.2046	3	9.70543	1.49917	16.6695	3	15.1239	1.54557	0.00451892	0.813216	5.78433	0.819
23.02.2012-24.02.2012	X2	I	zooplankton+krill_day1	9.6	121.949		144.322	3	2.33052	11.2046		9.70543	1.49917	15.3879	2	13.8024	1.58552	0.00899475	0.812887	6.11347	0.819
23.02.2012-24.02.2012	L9	I	zooplankton+krill_day1	9.16667	121.949		192.42	3	7.68769	11.2046		9.70543	1.49917	26.1926	3	21.427	4.76566	0.356344	0.807631	11.3685	0.819
23.02.2012-24.02.2012	X5	I	zooplankton+krill_day1	9.95	121.949		128.245	2	0.632744	11.2046		9.70543	1.49917	18.6483	3	17.4415	1.20674	-0.0293906	0.811008	7.992	0.819
23.02.2012-24.02.2012	L1	I	zooplankton+krill_day1	9.36667	121.949		254.385	1	14.1391	11.2046		9.70543	1.49917	22.3958	3	23.5187	-1.1229	-0.279937	0.810792	8.20785	0.819
23.02.2012-24.02.2012	L5	I	zooplankton+krill_day1	10.4	121.949		132.979	1	1.06056	11.2046		9.70543	1.49917	17.0056	3	15.3052	1.70034	0.0193431	0.813087	5.913	0.819
23.02.2012-24.02.2012	Control1	control	zooplankton+krill_day1	10.8833	121.949		145.802	1	2.1917	11.2046		9.70543	1.49917	10.1309	3	9.3263	0.804596	-0.0638204	0.819	0	0.819
23.02.2012-24.02.2012	Control2	control	zooplankton+krill_day1	10.9833	121.949		173.054	3	4.65292	11.2046		9.70543	1.49917	9.61382	3	8.92783	0.685991	-0.0740379	0.819	0	0.819
24.02.2012-25.02.2012	X1	I	zooplankton+krill_day2	11.0833	201.237	2	163.808	3	-3.37707	20.8374	3	17.3015	3.53583	23.8466	3	20.6178	3.22879	-0.0277025	0.813216	5.78433	0.819
24.02.2012-25.02.2012	X2	I	zooplankton+krill_day2	10.7333	201.237		332.257	3	12.2068	20.8374		17.3015	3.53583	21.2816	3	20.2391	1.04248	-0.2323	0.812887	6.11347	0.819
24.02.2012-25.02.2012	L9	I	zooplankton+krill_day2	10.15	201.237		184.477	3	-1.65128	20.8374		17.3015	3.53583	25.7542	3	26.6811	-0.926928	-0.43968	0.807631	11.3685	0.819
24.02.2012-25.02.2012	X5	I	zooplankton+krill_day2	10.4167	201.237		131.647	3	-6.68065	20.8374		17.3015	3.53583	24.6986	3	21.0852	3.61342	0.00744887	0.811008	7.992	0.819
24.02.2012-25.02.2012	L1	I	zooplankton+krill_day2	9.91667	201.237		169.294	3	-3.22116	20.8374		17.3015	3.53583	26.489	3	24.6552	1.83375	-0.171638	0.810792	8.20785	0.819
24.02.2012-25.02.2012	L5	I	zooplankton+krill_day2	11.3	201.237		130.818	3	-6.2318	20.8374		17.3015	3.53583	23.2315	3	27.5741	-4.34264	-0.697209	0.813087	5.913	0.819
24.02.2012-25.02.2012	Control1	control	zooplankton+krill_day2	11.5333	201.237		146.837	2	-4.71675	20.8374		17.3015	3.53583	19.1795	3	17.2226	1.95686	-0.136905	0.819	0	0.819
24.02.2012-25.02.2012	Control2	control	zooplankton+krill_day2	11.7	201.237		162.844	3	-3.28149	20.8374		17.3015	3.53583	19.6897	3	18.5528	1.13686	-0.20504	0.819	0	0.819
24.02.2012-25.02.2012	Control3	control	zooplankton+krill_day2	11.8833	201.237		116.334	3	-7.14474	20.8374		17.3015	3.53583	17.7127	3	18.6809	-0.968172	-0.379018	0.819	0	0.819

## Sheet: 1.9_Zooplankton_fjord
Location	Date	Time	Depth	Zooplankton density
			[m]	[zooplankter L-1]
Cross Huinay	2012-02-01	16:45:00	20	10.7023
Cross Huinay	2012-01-29	20:45:00	20	13.0435
Punta Gruesa	2012-01-24	20:00:00	20	35.6187
			mean	19.7882
			standard deviation	13.7595

[truncated: 1 more sheets: 1.10_Stats_LME]
